# Supplementary material for: Co nanoparticles encapsulated in N-doped carbon nanotube materials derived from new metal–organic frameworks for oxygen electrocatalysis
Source: Royal Society of Chemistry journal article supplement (doi:10.1039/d4ta07187e), 2024-11-27
Supplement: d4ta07187e1.pdf [file d4ta07187e1.pdf]

## ***Supporting Information***

### **Co nanoparticles encapsulated into N-doped carbon nanotube materials derived from new metal-organic frameworks for oxygen electrocatalysis**

*Jieling Zhang,<sup>a,†</sup> Weiran Suo,<sup>b,†</sup> Yu Han,<sup>b</sup> Yiwen Cao,<sup>a</sup> Yuhan Xu,<sup>a</sup> Mengying Wang,<sup>a</sup> Zuozhong Liang,<sup>a,\*</sup> Yuan Wang,<sup>b,\*</sup> Haoquan Zheng,<sup>a,\*</sup> and Rui Cao<sup>a,\*</sup>*

<sup>a</sup>Key Laboratory of Applied Surface and Colloid Chemistry, Ministry of Education, School of Chemistry and Chemical Engineering, Shaanxi Normal University, Xi'an 710119, China.

<sup>b</sup>School of Advanced Materials and Nanotechnology, Xidian University, Xi'an 710126, China.

Corresponding authors:

E-mail: liangzuozhong@snnu.edu.cn; yuanwang@xidian.edu.cn;

zhenghaoquan@snnu.edu.cn; ruicao@snnu.edu.cn.

<sup>†</sup>These authors contributed equally to this work.

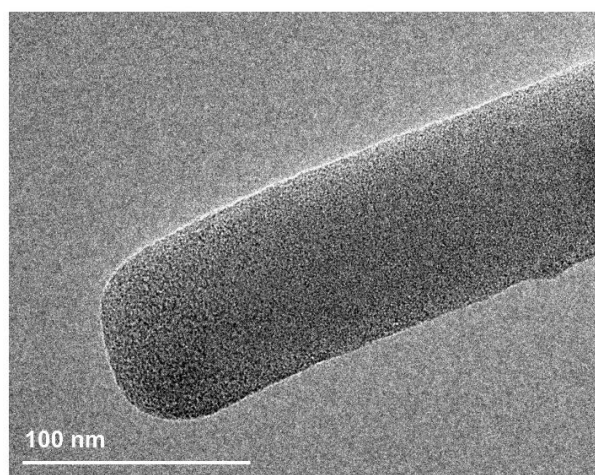

**Fig. S1.** TEM image of Co-MOF.

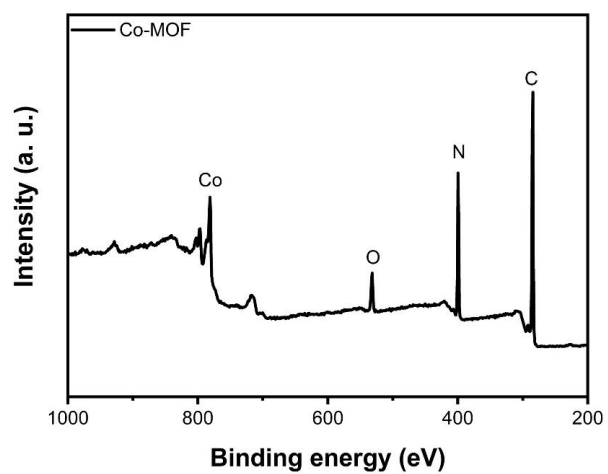

**Fig. S2.** Full survey XPS spectrum of Co-MOF.

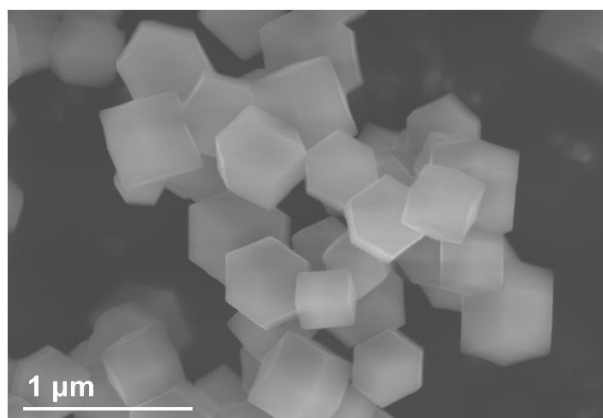

**Fig. S3.** SEM image of ZIF-67.

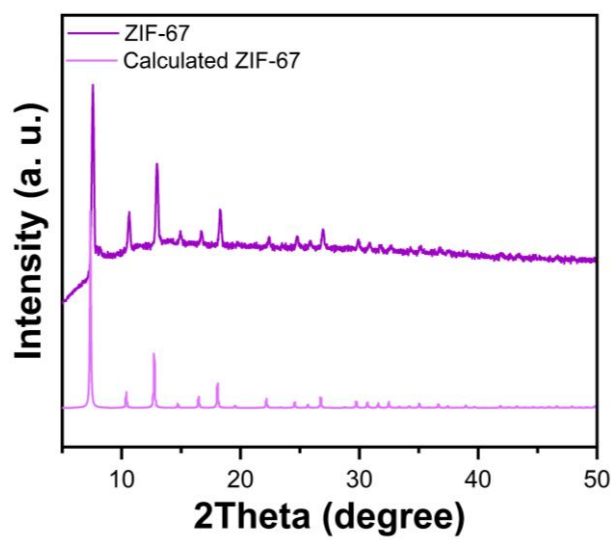

**Fig. S4.** XRD patterns of ZIF-67 and calculated ZIF-67.

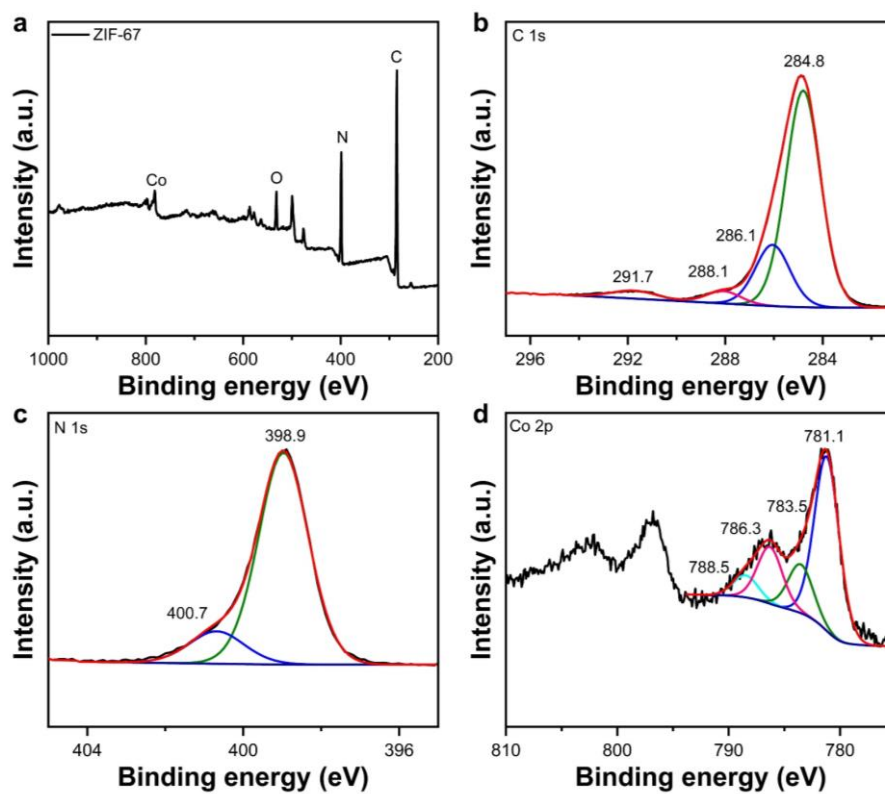

**Fig. S5.** Full survey XPS spectrum (a), XPS spectra of C 1s (b), N 1s (c), and Co 2p (d) for ZIF-67.

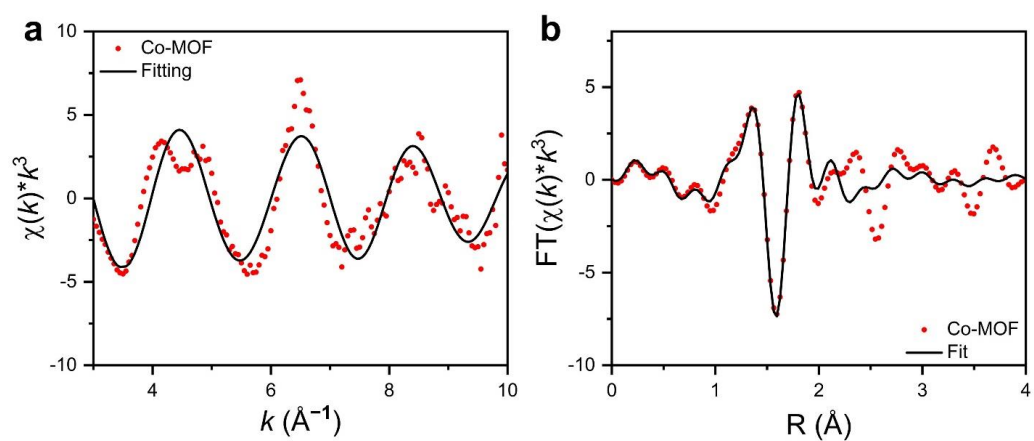

**Fig. S6.** (a) Corresponding Co K-edge  $k^3$ -weighted FT-EXAFS fitting curves of Co-MOF at  $R$  space ( $R$  imaginary) and (b)  $k$  space.

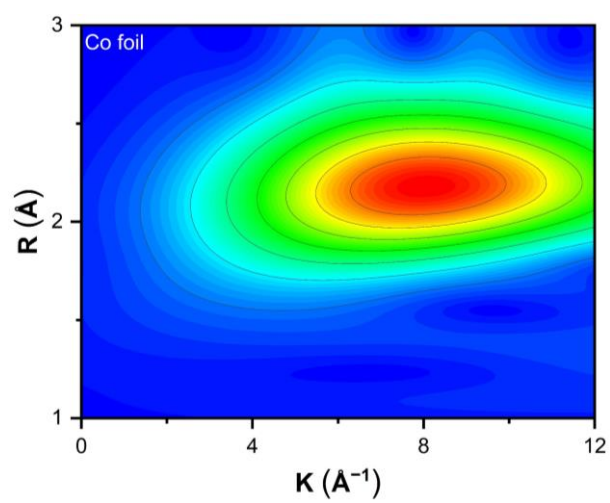

**Fig. S7.** Co K-edge WT-EXAFS contour plots of Co foil.



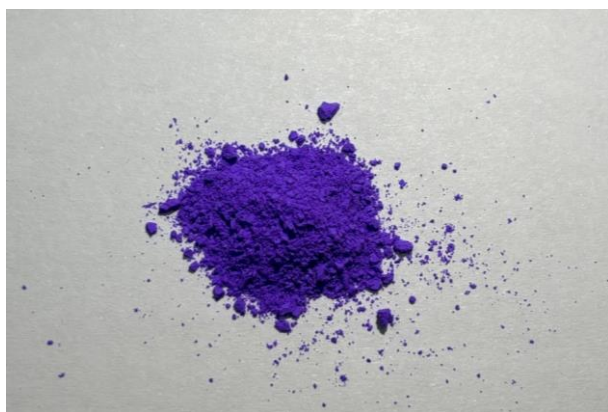

**Fig. S8.** Digital photo of ZIF-67.

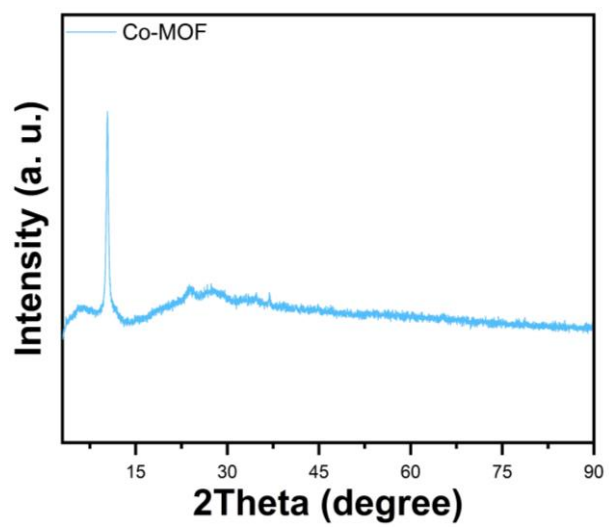

**Fig. S9.** XRD pattern of Co-MOF.

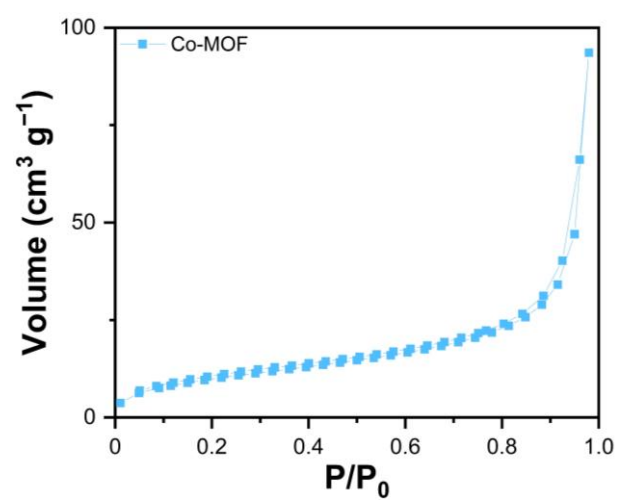

**Fig. S10.** N<sub>2</sub> adsorption/desorption isotherms of Co-MOF.

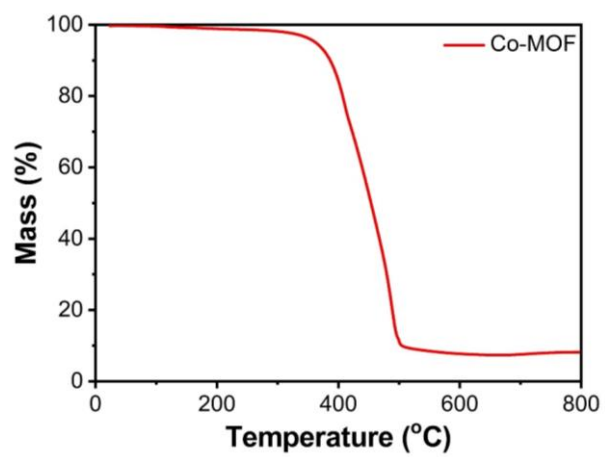

**Fig. S11.** The weight loss curve of Co-MOF.

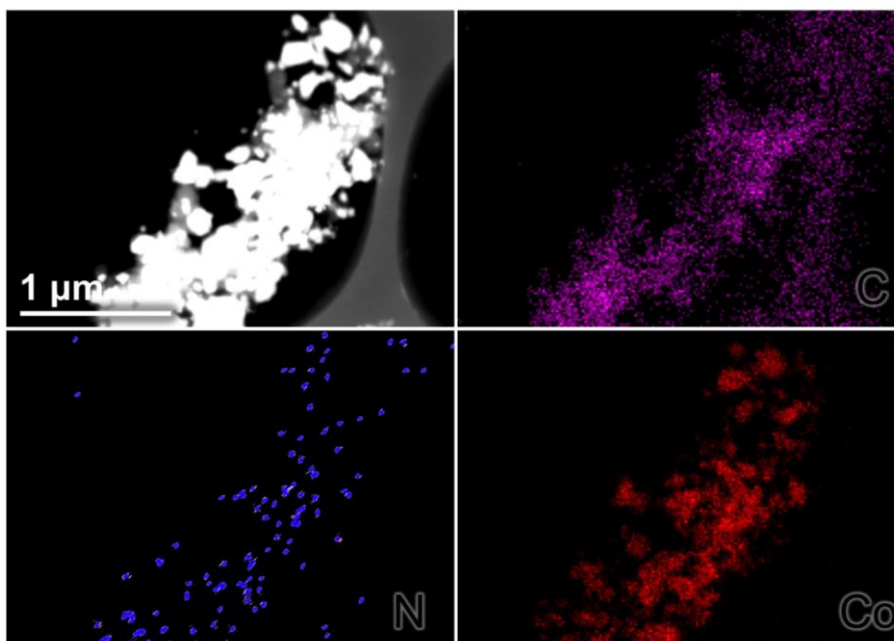

**Fig. S12.** HAADF-STEM image, and corresponding C, N, and Co elemental mappings of Co@N-CNT.

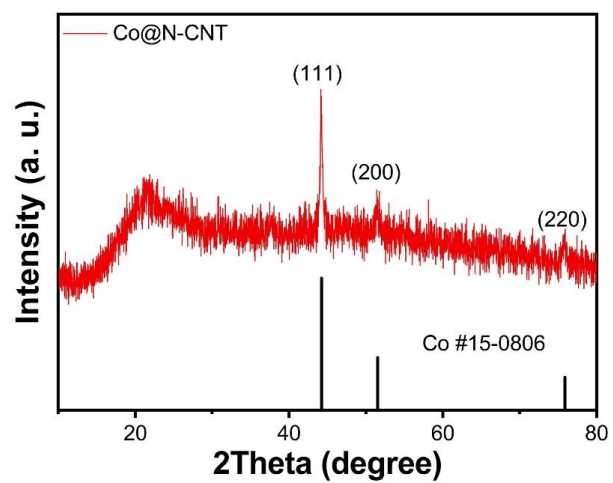

**Fig. S13.** XRD pattern of Co@N-CNT.

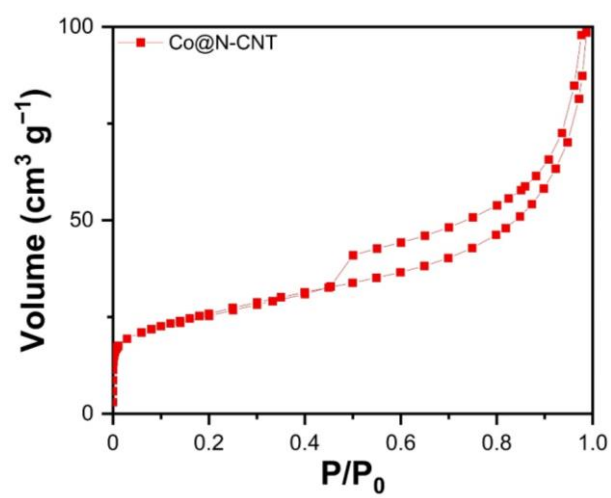

**Fig. S14.** N<sub>2</sub> adsorption/desorption isotherms of Co@N-CNT.

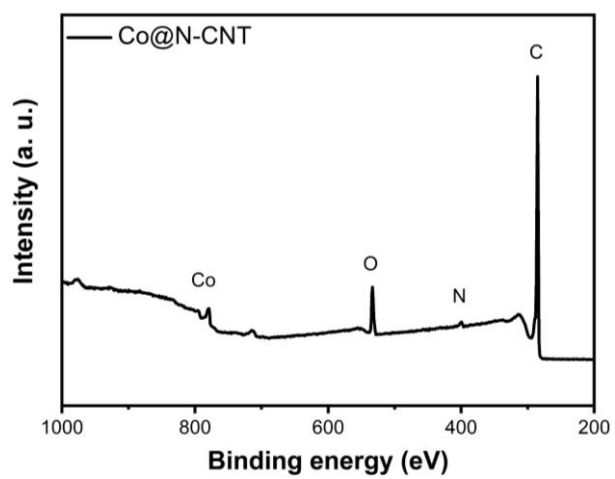

**Fig. S15.** Full survey XPS spectrum of Co@N-CNT.



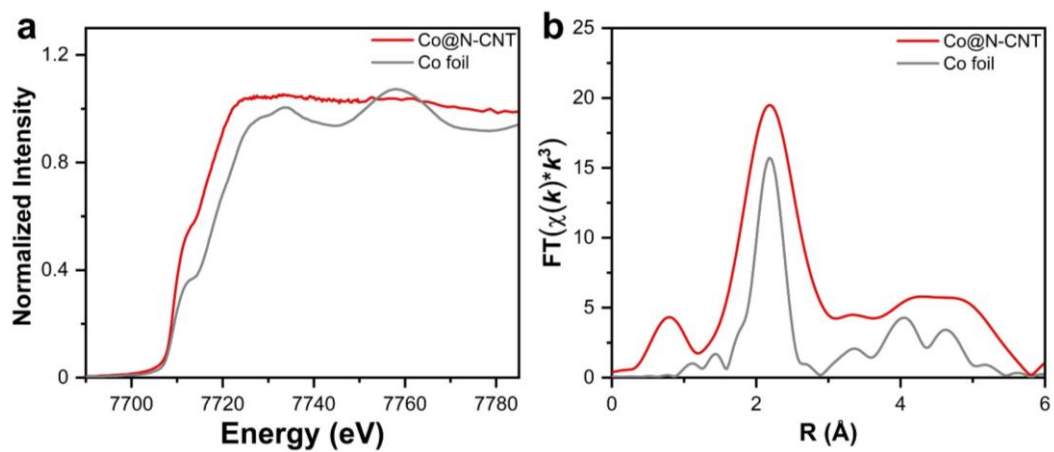

**Fig. S16.** (a) Normalized Co K-edge XANES and (b)  $k^3$ -weighted FT-EXAFS spectra (without phase correction) of Co@N-CNT and Co foil.

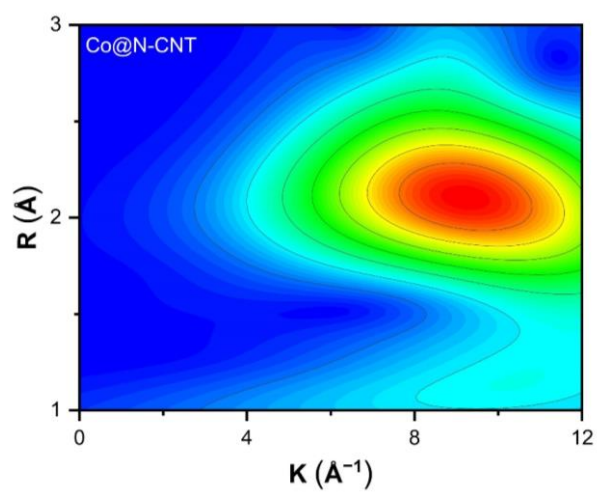

**Fig. S17.** Co K-edge WT-EXAFS contour plots of Co@N-CNT.

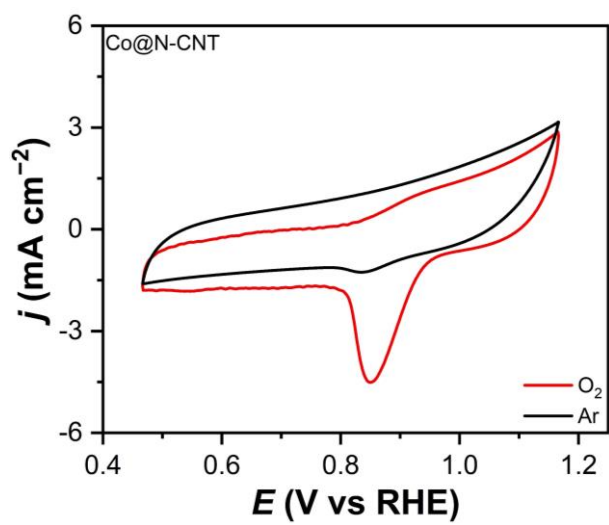

**Fig. S18.** CV data of Co@N-CNT measured in Ar and  $\text{O}_2$ -saturated 0.1 M KOH solutions.

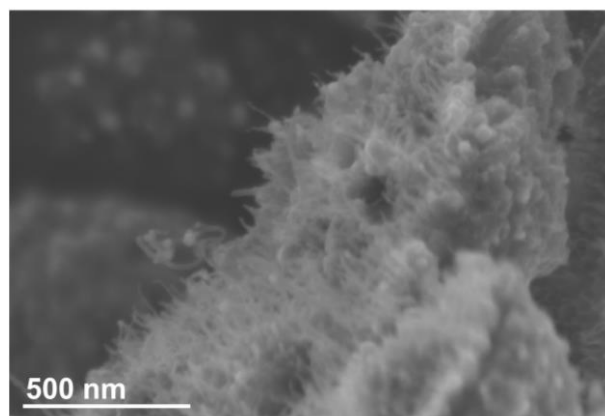

**Fig. S19.** SEM image of Co@N-CNT-800.

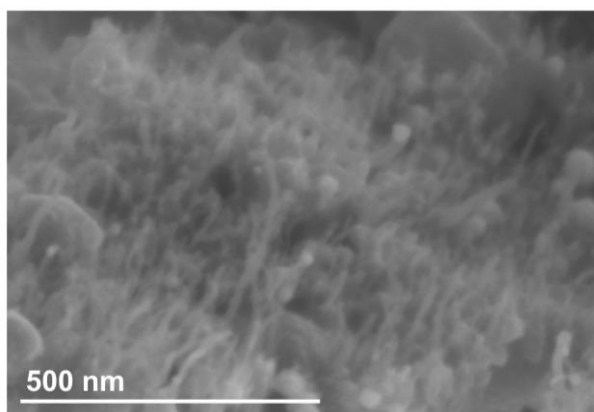

**Fig. S20.** SEM image of Co@N-CNT-1000

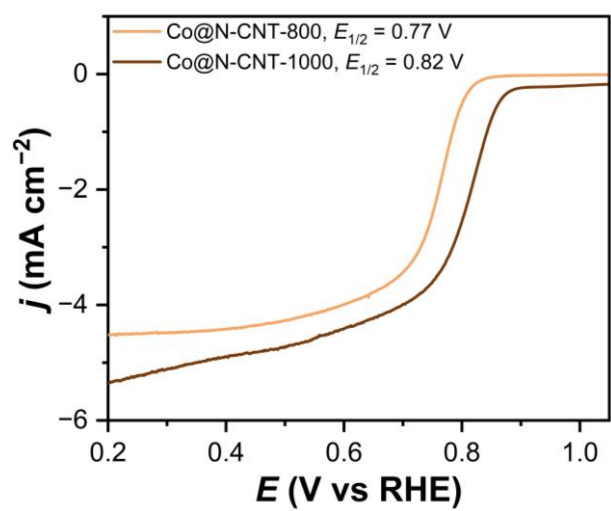

**Fig. S21.** ORR LSV curves of Co@N-CNT-800 and Co@N-CNT-1000.

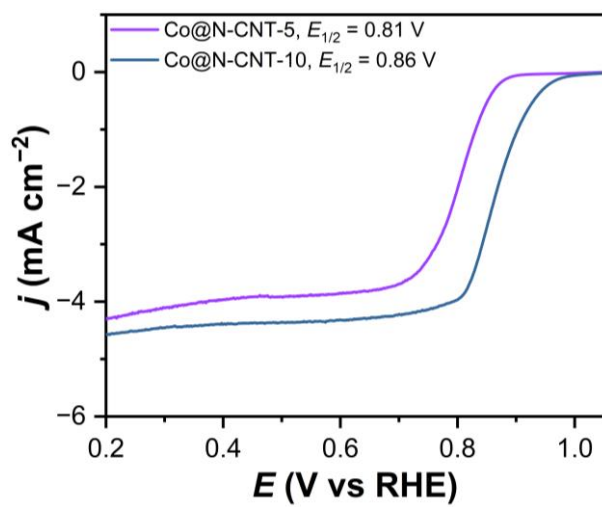

**Fig. S22.** ORR LSV curves of Co@N-CNT-5 and Co@N-CNT-10.

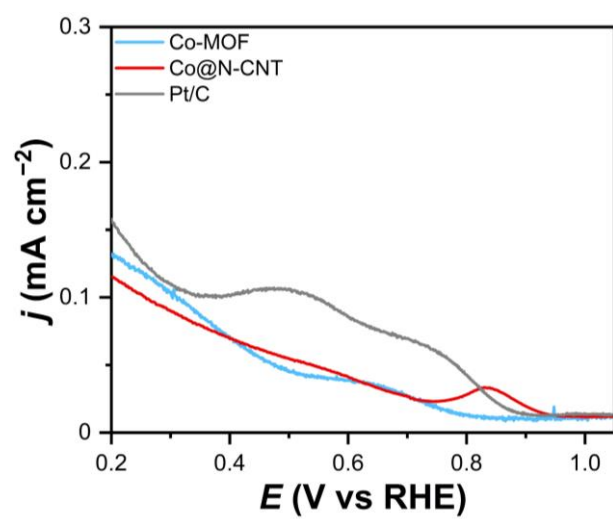

**Fig. S23.** ORR LSV data of Co-MOF, Co@N-CNT and Pt/C on the ring electrode.



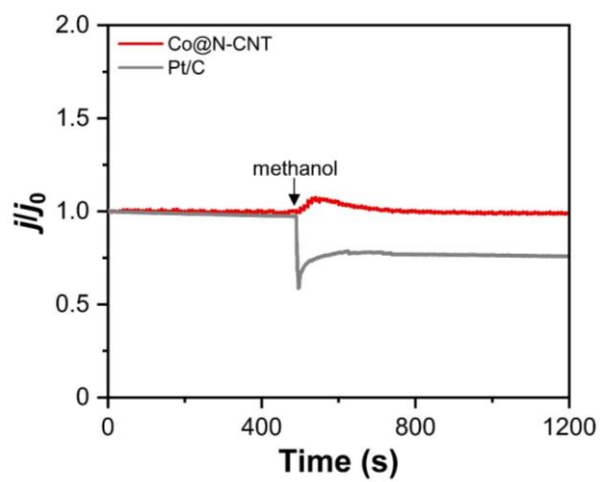

**Fig. S24.** Methanol resistance results of Co@N-CNT and Pt/C.

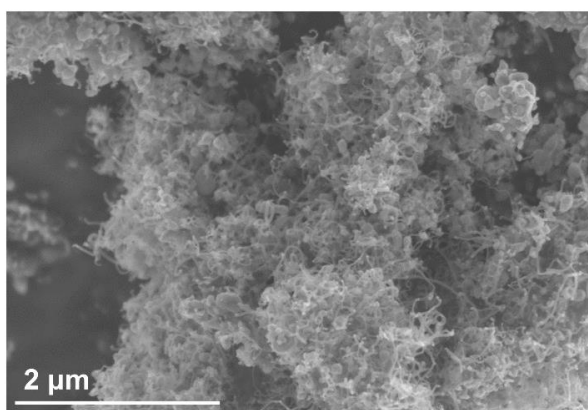

**Fig. S25.** SEM image of Co@N-CNT after ORR.

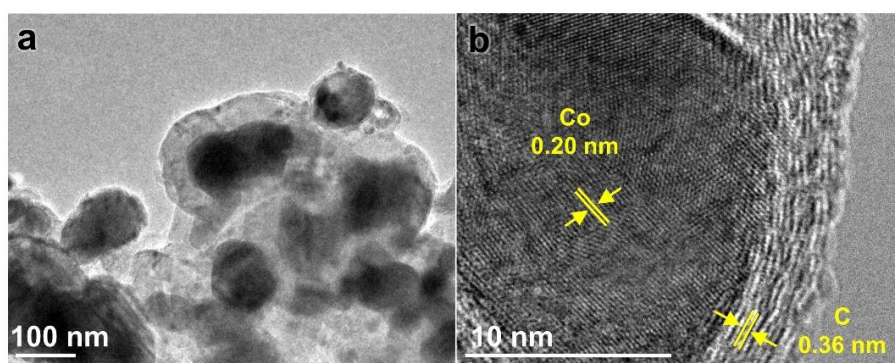

**Fig. S26.** TEM images of Co@N-CNT after ORR.

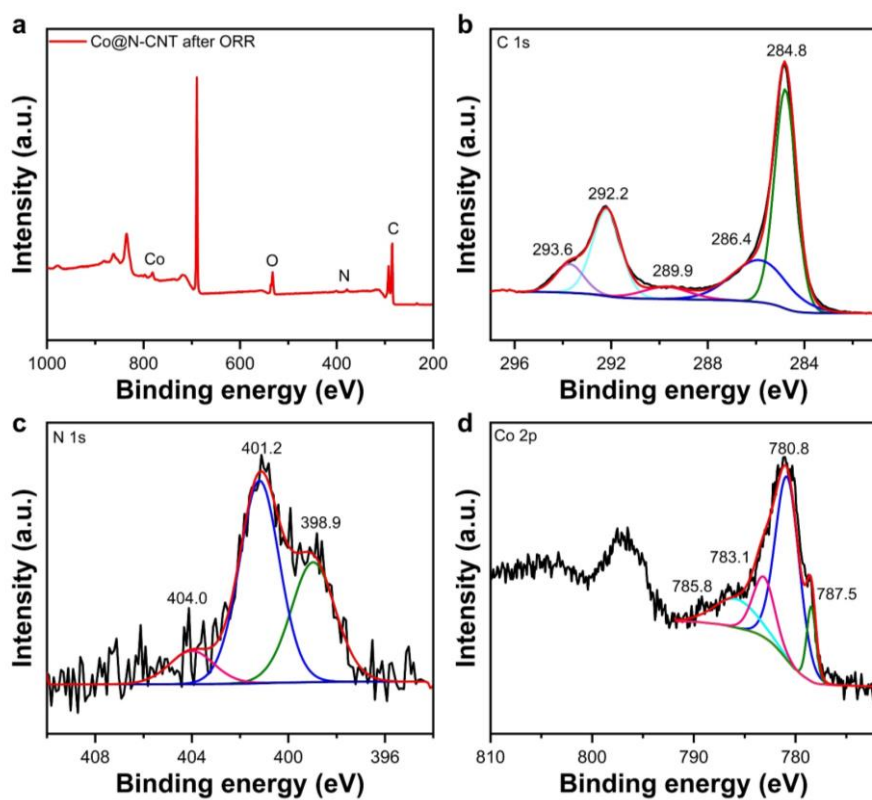

**Fig. S27.** Full survey XPS spectrum (a), XPS spectra of C 1s (b), N 1s (c) and Co 2p (d) for Co@N-CNT after ORR.

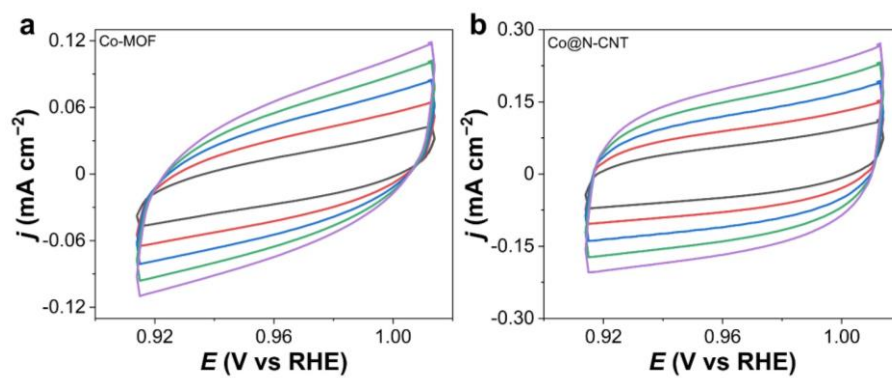

**Fig. S28.** CV data of Co-MOF and Co@N-CNT at 20, 40, 60, 80, and 100  $\text{mV s}^{-1}$ .

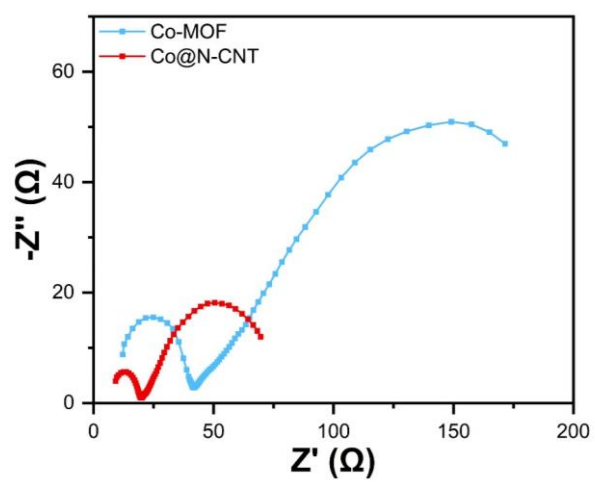

**Fig. S29.** Nyquist plots of Co-MOF and Co@N-CNT.

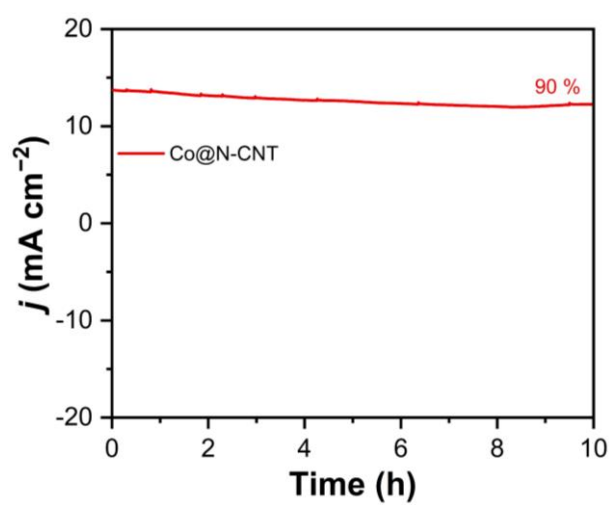

**Fig. S30.** Stability test of Co@N-CNT measured in a 1.0 M KOH solution.

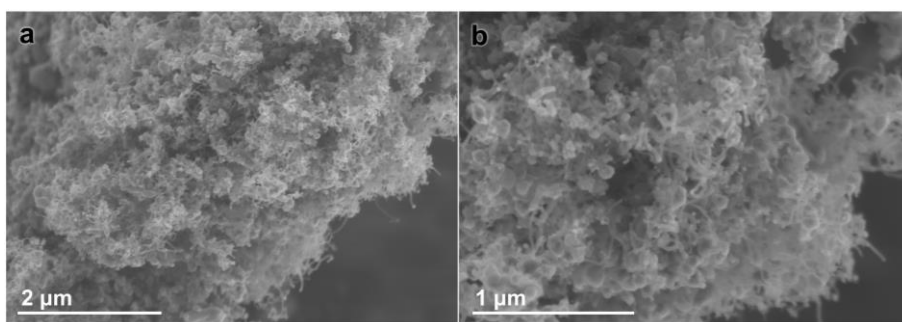

**Fig. S31.** SEM images of Co@N-CNT after OER.



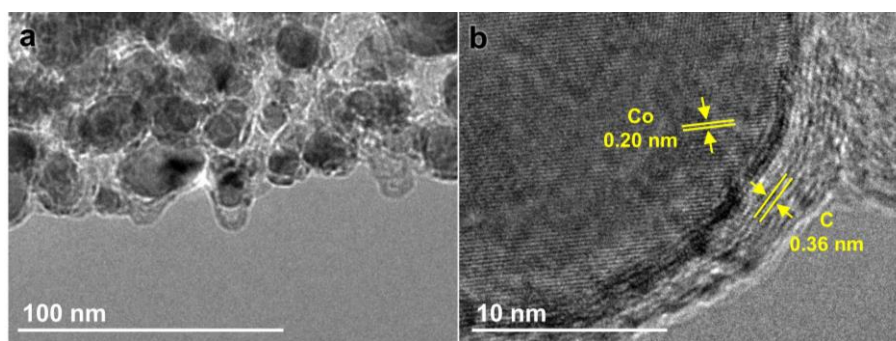

**Fig. S32.** TEM images of Co@N-CNT after OER.

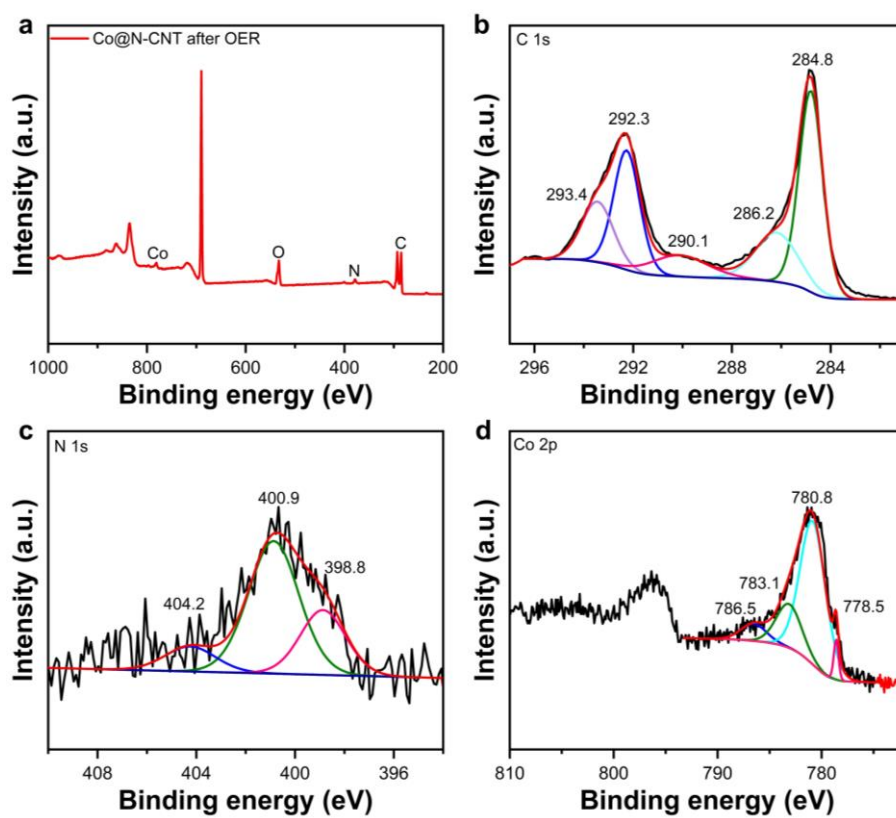

**Fig. S33.** Full survey XPS spectrum (a), XPS spectra of C 1s (b), N 1s (c), and Co 2p (d) for Co@N-CNT after OER.

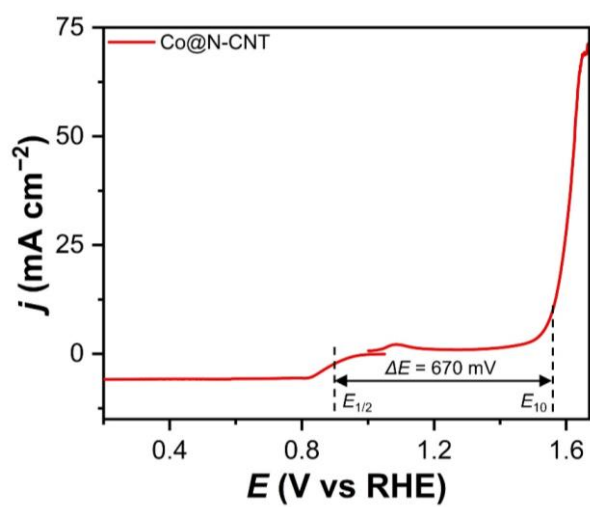

**Fig. S34.** ORR/OER LSV data of Co@N-CNT.

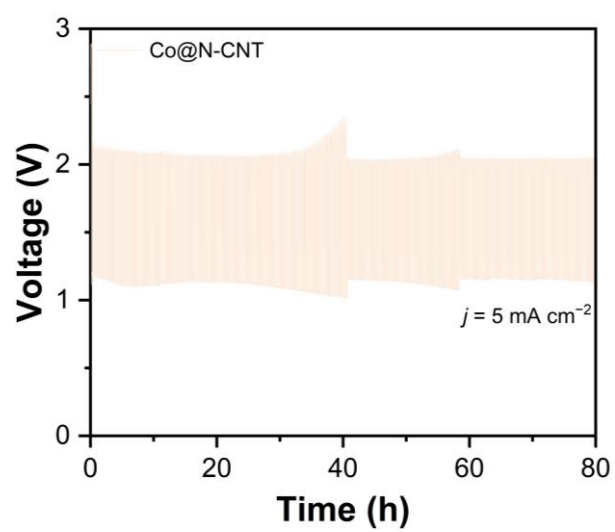

**Fig. S35.** Stability test at  $j = 5 \text{ mA cm}^{-2}$  by a Zn-air battery assembled with Co@N-CNT.

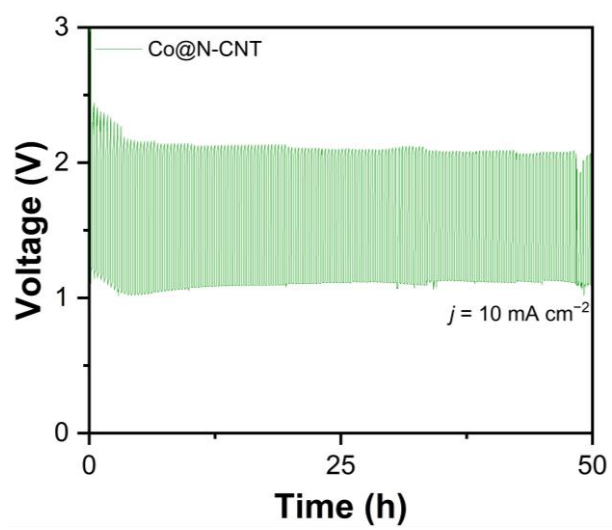

**Fig. S36.** Stability test at  $j = 10 \text{ mA cm}^{-2}$  by a Zn-air battery assembled with Co@N-CNT.

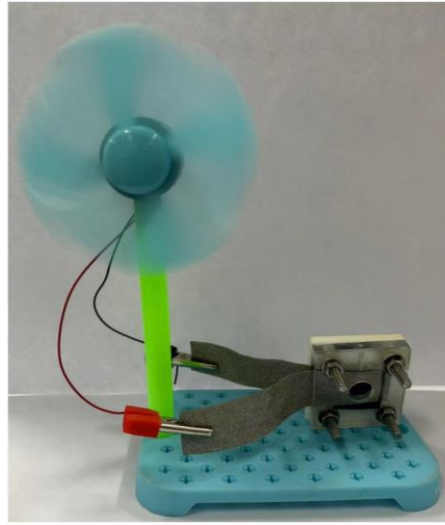

**Fig. S37.** A running toy fan powered by a Zn-air battery constructed with Co@N-CNT.

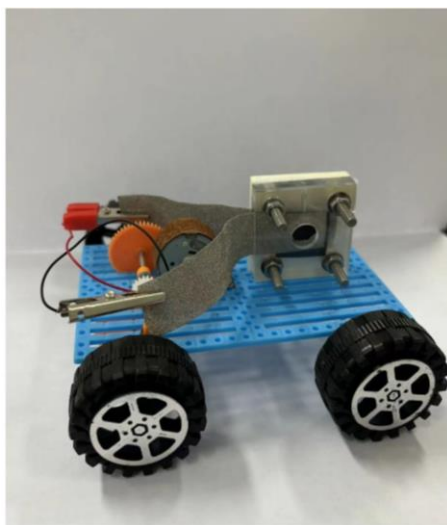

**Fig. S38.** A toy car powered by a Zn-air battery constructed with Co@N-CNT.

**Table S1.** The atomic proportions of Co-MOF and ZIF-67 given in XPS.

| <b>Elements</b> | <b>Atomic %</b> |               |
|-----------------|-----------------|---------------|
|                 | <b>Co-MOF</b>   | <b>ZIF-67</b> |
| C               | 66.36           | 69.53         |
| Co              | 6.19            | 2.13          |
| N               | 21.59           | 19.97         |



**Table S2.** Comparison of ORR and OER performance of Co@N-CNT and other Co-based catalysts.

| Catalysts                                                               | ORR           | OER                    | References       |
|-------------------------------------------------------------------------|---------------|------------------------|------------------|
|                                                                         | $E_{1/2}$ (V) | $\eta$ (mV, $j_{10}$ ) |                  |
| Co@N-CNT                                                                | <b>0.88</b>   | <b>320</b>             | <b>This work</b> |
| Co <sub>4</sub> -Co-MOF                                                 | 0.83          | 357                    | 1                |
| Co <sub>4</sub> N/CoNC                                                  | 0.833         | 270                    | 2                |
| Onion-like carbon/Co-N-C                                                | 0.855         | 344                    | 3                |
| NiCo <sub>1.8</sub> Fe <sub>0.2</sub> O <sub>4</sub> @N-carbon          | 0.86          | 270                    | 4                |
| Co corrols@CNT                                                          | 0.80          | 450                    | 5                |
| Co <sub>3</sub> O <sub>4-x</sub> doped graphene                         | 0.829         | 327                    | 6                |
| Co/N-boron graphene                                                     | 0.867         | 365                    | 7                |
| PVP-ZIF-67-4                                                            | 0.85          | 315                    | 8                |
| Ni <sub>x</sub> Co <sub>9-x</sub> S <sub>8</sub> @ N, S co-doped carbon | 0.926         | 289                    | 9                |
| Co <sub>3</sub> O <sub>4</sub> /RuO <sub>2</sub> /carbon sheets         | 0.90          | 290                    | 10               |
| Co-N-C@HCNT                                                             | 0.86          | 385                    | 11               |
| CoFe/Co-N-C                                                             | 0.86          | 380                    | 12               |
| Zn <sub>20</sub> Co-N-C                                                 | 0.915         | -                      | 13               |
| Co@N-doped graphene                                                     | 0.85          | -                      | 14               |
| N/P-C-CoP-850                                                           | 0.825         | 306                    | 15               |
| MoC/Co-N-C-600                                                          | 0.865         | 370                    | 16               |
| A-Co-N-C                                                                | 0.884         | 334                    | 17               |
| NiS <sub>2</sub> @Co-N-C/nanoarchitecture                               | 0.80          | 300                    | 18               |
| Pt <sub>SA</sub> -PtCo NCs/N-CNTs-900                                   | 0.86          | 252                    | 19               |
| Co-single-atom/N-C/reduced graphene oxide                               | 0.84          | -                      | 20               |

**Table S3.** Comparison of peak power densities of Zn-air batteries constructed with Co@N-CNT and other reported catalysts.

| <b>Catalysts</b>                    | <b>Voltage gap (V)</b> | <b>Peak power density<br/>(mW cm<sup>-2</sup>)</b> | <b>References</b> |
|-------------------------------------|------------------------|----------------------------------------------------|-------------------|
| <b>Co@N-CNT</b>                     | <b>0.82</b>            | <b>235</b>                                         | <b>This work</b>  |
| Co-N-C                              | 0.85                   | 203                                                | 21                |
| Co-porous organic<br>polymers       | 0.91                   | 207.1                                              | 22                |
| Onion-like<br>carbon/Co-N-C         | 0.80                   | 238                                                | 3                 |
| CoSAs@NC-920                        | 0.812                  | 166                                                | 23                |
| NCo@CNT-<br>nanofiber700            | 0.80                   | 220                                                | 24                |
| A-Co-N-C                            | 0.85                   | 240                                                | 17                |
| Co-N <sub>4-x</sub> -C <sub>x</sub> | 0.80                   | 184                                                | 25                |
| (Co, Fe) <sub>3</sub> N             | 0.85                   | 234                                                | 26                |
| Fe <sub>atomic clusters</sub> @N-C  | 0.80                   | 171.5                                              | 27                |
| Co-FNC                              | 0.90                   | 246                                                | 28                |
| HfCo-NC                             | -                      | 184                                                | 29                |
| Co/N, S-C                           | 0.82                   | 173.1                                              | 30                |
| Cl-Co-N <sub>4</sub>                | 0.80                   | 176.6                                              | 31                |

**Atomic coordinates of cobalt cluster cell models.**

|    |    |      | x       | y       | z       | Occ.  | U     | Site | Sym. |
|----|----|------|---------|---------|---------|-------|-------|------|------|
| 1  | Co | Co1  | 0.51837 | 0.49721 | 0.52594 | 1.000 | 0.000 | 1a   | 1    |
| 2  | Co | Co2  | 0.51837 | 0.65019 | 0.59354 | 1.000 | 0.000 | 1a   | 1    |
| 3  | Co | Co3  | 0.69501 | 0.58554 | 0.59354 | 1.000 | 0.000 | 1a   | 1    |
| 4  | Co | Co4  | 0.69501 | 0.73852 | 0.52594 | 1.000 | 0.000 | 1a   | 1    |
| 5  | Co | Co5  | 0.51837 | 0.34424 | 0.45835 | 1.000 | 0.000 | 1a   | 1    |
| 6  | Co | Co6  | 0.34172 | 0.40889 | 0.45835 | 1.000 | 0.000 | 1a   | 1    |
| 7  | Co | Co7  | 0.51837 | 0.65019 | 0.45835 | 1.000 | 0.000 | 1a   | 1    |
| 8  | Co | Co8  | 0.69501 | 0.58554 | 0.45835 | 1.000 | 0.000 | 1a   | 1    |
| 9  | Co | Co9  | 0.34172 | 0.25591 | 0.52594 | 1.000 | 0.000 | 1a   | 1    |
| 10 | Co | Co10 | 0.51837 | 0.34424 | 0.59354 | 1.000 | 0.000 | 1a   | 1    |
| 11 | Co | Co11 | 0.69501 | 0.43256 | 0.52594 | 1.000 | 0.000 | 1a   | 1    |
| 12 | Co | Co12 | 0.34172 | 0.40889 | 0.59354 | 1.000 | 0.000 | 1a   | 1    |
| 13 | Co | Co13 | 0.34172 | 0.56187 | 0.52594 | 1.000 | 0.000 | 1a   | 1    |

**Atomic coordinates of Co@CNT cell models.**

|    |       | x       | y       | z       | Occ.  | U     | Site | Sym. |
|----|-------|---------|---------|---------|-------|-------|------|------|
| 1  | C C1  | 0.91886 | 0.75352 | 0.00527 | 1.000 | 0.000 | 1a   | 1    |
| 2  | C C2  | 0.90068 | 0.81933 | 0.04725 | 1.000 | 0.000 | 1a   | 1    |
| 3  | C C3  | 0.77306 | 0.92173 | 0.00598 | 1.000 | 0.000 | 1a   | 1    |
| 4  | C C4  | 0.83473 | 0.89610 | 0.04753 | 1.000 | 0.000 | 1a   | 1    |
| 5  | C C5  | 0.35353 | 0.77515 | 0.00565 | 1.000 | 0.000 | 1a   | 1    |
| 6  | C C6  | 0.66899 | 0.92885 | 0.00619 | 1.000 | 0.000 | 1a   | 1    |
| 7  | C C7  | 0.58221 | 0.90391 | 0.04799 | 1.000 | 0.000 | 1a   | 1    |
| 8  | C C8  | 0.24406 | 0.66897 | 0.00538 | 1.000 | 0.000 | 1a   | 1    |
| 9  | C C9  | 0.17942 | 0.58478 | 0.04735 | 1.000 | 0.000 | 1a   | 1    |
| 10 | C C10 | 0.43925 | 0.83545 | 0.04774 | 1.000 | 0.000 | 1a   | 1    |
| 11 | C C11 | 0.08525 | 0.35644 | 0.00525 | 1.000 | 0.000 | 1a   | 1    |
| 12 | C C12 | 0.10659 | 0.44154 | 0.04717 | 1.000 | 0.000 | 1a   | 1    |
| 13 | C C13 | 0.22627 | 0.07821 | 0.00594 | 1.000 | 0.000 | 1a   | 1    |
| 14 | C C14 | 0.08028 | 0.24631 | 0.00529 | 1.000 | 0.000 | 1a   | 1    |
| 15 | C C15 | 0.09876 | 0.18062 | 0.04724 | 1.000 | 0.000 | 1a   | 1    |
| 16 | C C16 | 0.33024 | 0.07092 | 0.00620 | 1.000 | 0.000 | 1a   | 1    |
| 17 | C C17 | 0.41710 | 0.09599 | 0.04799 | 1.000 | 0.000 | 1a   | 1    |
| 18 | C C18 | 0.16470 | 0.10388 | 0.04753 | 1.000 | 0.000 | 1a   | 1    |
| 19 | C C19 | 0.64558 | 0.22474 | 0.00559 | 1.000 | 0.000 | 1a   | 1    |
| 20 | C C20 | 0.56000 | 0.16454 | 0.04772 | 1.000 | 0.000 | 1a   | 1    |
| 21 | C C21 | 0.91384 | 0.64337 | 0.00522 | 1.000 | 0.000 | 1a   | 1    |
| 22 | C C22 | 0.75493 | 0.33103 | 0.00536 | 1.000 | 0.000 | 1a   | 1    |
| 23 | C C23 | 0.81983 | 0.41515 | 0.04732 | 1.000 | 0.000 | 1a   | 1    |
| 24 | C C24 | 0.89272 | 0.55840 | 0.04715 | 1.000 | 0.000 | 1a   | 1    |

|      |     |         |         |         |       |       |    |   |
|------|-----|---------|---------|---------|-------|-------|----|---|
| 25 C | C25 | 0.91522 | 0.76137 | 0.09457 | 1.000 | 0.000 | 1a | 1 |
| 26 C | C26 | 0.89609 | 0.81256 | 0.14223 | 1.000 | 0.000 | 1a | 1 |
| 27 C | C27 | 0.77806 | 0.91084 | 0.09521 | 1.000 | 0.000 | 1a | 1 |
| 28 C | C28 | 0.82635 | 0.88630 | 0.14249 | 1.000 | 0.000 | 1a | 1 |
| 29 C | C29 | 0.36566 | 0.77939 | 0.09510 | 1.000 | 0.000 | 1a | 1 |
| 30 C | C30 | 0.65316 | 0.91401 | 0.09540 | 1.000 | 0.000 | 1a | 1 |
| 31 C | C31 | 0.58142 | 0.89117 | 0.14283 | 1.000 | 0.000 | 1a | 1 |
| 32 C | C32 | 0.23697 | 0.65585 | 0.09493 | 1.000 | 0.000 | 1a | 1 |
| 33 C | C33 | 0.18861 | 0.58323 | 0.14233 | 1.000 | 0.000 | 1a | 1 |
| 34 C | C34 | 0.43738 | 0.82461 | 0.14269 | 1.000 | 0.000 | 1a | 1 |
| 35 C | C35 | 0.08957 | 0.36784 | 0.09453 | 1.000 | 0.000 | 1a | 1 |
| 36 C | C36 | 0.11480 | 0.43932 | 0.14223 | 1.000 | 0.000 | 1a | 1 |
| 37 C | C37 | 0.22129 | 0.08909 | 0.09521 | 1.000 | 0.000 | 1a | 1 |
| 38 C | C38 | 0.08424 | 0.23857 | 0.09459 | 1.000 | 0.000 | 1a | 1 |
| 39 C | C39 | 0.10329 | 0.18731 | 0.14225 | 1.000 | 0.000 | 1a | 1 |
| 40 C | C40 | 0.34630 | 0.08613 | 0.09540 | 1.000 | 0.000 | 1a | 1 |
| 41 C | C41 | 0.41810 | 0.10891 | 0.14281 | 1.000 | 0.000 | 1a | 1 |
| 42 C | C42 | 0.17300 | 0.11351 | 0.14250 | 1.000 | 0.000 | 1a | 1 |
| 43 C | C43 | 0.63374 | 0.22057 | 0.09506 | 1.000 | 0.000 | 1a | 1 |
| 44 C | C44 | 0.56213 | 0.17512 | 0.14267 | 1.000 | 0.000 | 1a | 1 |
| 45 C | C45 | 0.90997 | 0.63210 | 0.09451 | 1.000 | 0.000 | 1a | 1 |
| 46 C | C46 | 0.76244 | 0.34406 | 0.09488 | 1.000 | 0.000 | 1a | 1 |
| 47 C | C47 | 0.81085 | 0.41665 | 0.14229 | 1.000 | 0.000 | 1a | 1 |
| 48 C | C48 | 0.88466 | 0.56055 | 0.14218 | 1.000 | 0.000 | 1a | 1 |
| 49 C | C49 | 0.91265 | 0.75997 | 0.18956 | 1.000 | 0.000 | 1a | 1 |
| 50 C | C50 | 0.89395 | 0.81096 | 0.23694 | 1.000 | 0.000 | 1a | 1 |

|      |     |         |         |         |       |       |    |   |
|------|-----|---------|---------|---------|-------|-------|----|---|
| 51 C | C51 | 0.77412 | 0.90403 | 0.18979 | 1.000 | 0.000 | 1a | 1 |
| 52 C | C52 | 0.82398 | 0.88408 | 0.23700 | 1.000 | 0.000 | 1a | 1 |
| 53 C | C53 | 0.36618 | 0.77440 | 0.18984 | 1.000 | 0.000 | 1a | 1 |
| 54 C | C54 | 0.65086 | 0.90662 | 0.18990 | 1.000 | 0.000 | 1a | 1 |
| 55 C | C55 | 0.58071 | 0.88861 | 0.23694 | 1.000 | 0.000 | 1a | 1 |
| 56 C | C56 | 0.23984 | 0.65244 | 0.18977 | 1.000 | 0.000 | 1a | 1 |
| 57 C | C57 | 0.18961 | 0.58184 | 0.23695 | 1.000 | 0.000 | 1a | 1 |
| 58 C | C58 | 0.43697 | 0.82171 | 0.23700 | 1.000 | 0.000 | 1a | 1 |
| 59 C | C59 | 0.09303 | 0.36797 | 0.18954 | 1.000 | 0.000 | 1a | 1 |
| 60 C | C60 | 0.11546 | 0.43827 | 0.23687 | 1.000 | 0.000 | 1a | 1 |
| 61 C | C61 | 0.22538 | 0.09585 | 0.18980 | 1.000 | 0.000 | 1a | 1 |
| 62 C | C62 | 0.08665 | 0.23981 | 0.18960 | 1.000 | 0.000 | 1a | 1 |
| 63 C | C63 | 0.10545 | 0.18879 | 0.23697 | 1.000 | 0.000 | 1a | 1 |
| 64 C | C64 | 0.34874 | 0.09334 | 0.18992 | 1.000 | 0.000 | 1a | 1 |
| 65 C | C65 | 0.41899 | 0.11111 | 0.23692 | 1.000 | 0.000 | 1a | 1 |
| 66 C | C66 | 0.17553 | 0.11571 | 0.23702 | 1.000 | 0.000 | 1a | 1 |
| 67 C | C67 | 0.63346 | 0.22523 | 0.18981 | 1.000 | 0.000 | 1a | 1 |
| 68 C | C68 | 0.56279 | 0.17775 | 0.23700 | 1.000 | 0.000 | 1a | 1 |
| 69 C | C69 | 0.90645 | 0.63188 | 0.18950 | 1.000 | 0.000 | 1a | 1 |
| 70 C | C70 | 0.75964 | 0.34740 | 0.18973 | 1.000 | 0.000 | 1a | 1 |
| 71 C | C71 | 0.80993 | 0.41810 | 0.23691 | 1.000 | 0.000 | 1a | 1 |
| 72 C | C72 | 0.88414 | 0.56162 | 0.23682 | 1.000 | 0.000 | 1a | 1 |
| 73 C | C73 | 0.90938 | 0.75849 | 0.28429 | 1.000 | 0.000 | 1a | 1 |
| 74 C | C74 | 0.88737 | 0.80752 | 0.33126 | 1.000 | 0.000 | 1a | 1 |
| 75 C | C75 | 0.77310 | 0.90444 | 0.28411 | 1.000 | 0.000 | 1a | 1 |
| 76 C | C76 | 0.81905 | 0.88124 | 0.33126 | 1.000 | 0.000 | 1a | 1 |

|       |      |         |         |         |       |       |    |   |
|-------|------|---------|---------|---------|-------|-------|----|---|
| 77 C  | C77  | 0.36691 | 0.77277 | 0.28428 | 1.000 | 0.000 | 1a | 1 |
| 78 C  | C78  | 0.64992 | 0.90700 | 0.28417 | 1.000 | 0.000 | 1a | 1 |
| 79 C  | C79  | 0.57985 | 0.88737 | 0.33126 | 1.000 | 0.000 | 1a | 1 |
| 80 C  | C80  | 0.24092 | 0.65073 | 0.28431 | 1.000 | 0.000 | 1a | 1 |
| 81 C  | C81  | 0.19248 | 0.57985 | 0.33126 | 1.000 | 0.000 | 1a | 1 |
| 82 C  | C82  | 0.43782 | 0.81905 | 0.33126 | 1.000 | 0.000 | 1a | 1 |
| 83 C  | C83  | 0.09450 | 0.36789 | 0.28415 | 1.000 | 0.000 | 1a | 1 |
| 84 C  | C84  | 0.11876 | 0.43782 | 0.33126 | 1.000 | 0.000 | 1a | 1 |
| 85 C  | C85  | 0.22676 | 0.09554 | 0.28408 | 1.000 | 0.000 | 1a | 1 |
| 86 C  | C86  | 0.09032 | 0.24137 | 0.28432 | 1.000 | 0.000 | 1a | 1 |
| 87 C  | C87  | 0.11263 | 0.19248 | 0.33126 | 1.000 | 0.000 | 1a | 1 |
| 88 C  | C88  | 0.34990 | 0.09291 | 0.28417 | 1.000 | 0.000 | 1a | 1 |
| 89 C  | C89  | 0.42015 | 0.11263 | 0.33126 | 1.000 | 0.000 | 1a | 1 |
| 90 C  | C90  | 0.18095 | 0.11876 | 0.33126 | 1.000 | 0.000 | 1a | 1 |
| 91 C  | C91  | 0.63295 | 0.22702 | 0.28425 | 1.000 | 0.000 | 1a | 1 |
| 92 C  | C92  | 0.56218 | 0.18095 | 0.33126 | 1.000 | 0.000 | 1a | 1 |
| 93 C  | C93  | 0.90525 | 0.63203 | 0.28412 | 1.000 | 0.000 | 1a | 1 |
| 94 C  | C94  | 0.75882 | 0.34926 | 0.28429 | 1.000 | 0.000 | 1a | 1 |
| 95 C  | C95  | 0.80752 | 0.42015 | 0.33126 | 1.000 | 0.000 | 1a | 1 |
| 96 C  | C96  | 0.88124 | 0.56218 | 0.33126 | 1.000 | 0.000 | 1a | 1 |
| 97 C  | C97  | 0.90431 | 0.75601 | 0.37858 | 1.000 | 0.000 | 1a | 1 |
| 98 C  | C98  | 0.88737 | 0.80752 | 0.42590 | 1.000 | 0.000 | 1a | 1 |
| 99 C  | C99  | 0.76975 | 0.90120 | 0.37858 | 1.000 | 0.000 | 1a | 1 |
| 100 C | C100 | 0.81905 | 0.88124 | 0.42590 | 1.000 | 0.000 | 1a | 1 |
| 101 C | C101 | 0.36855 | 0.76975 | 0.37858 | 1.000 | 0.000 | 1a | 1 |
| 102 C | C102 | 0.64830 | 0.90431 | 0.37858 | 1.000 | 0.000 | 1a | 1 |

|       |      |         |         |         |       |       |    |   |
|-------|------|---------|---------|---------|-------|-------|----|---|
| 103 C | C103 | 0.57985 | 0.88737 | 0.42590 | 1.000 | 0.000 | 1a | 1 |
| 104 C | C104 | 0.24399 | 0.64830 | 0.37858 | 1.000 | 0.000 | 1a | 1 |
| 105 C | C105 | 0.19248 | 0.57985 | 0.42590 | 1.000 | 0.000 | 1a | 1 |
| 106 C | C106 | 0.43782 | 0.81905 | 0.42590 | 1.000 | 0.000 | 1a | 1 |
| 107 C | C107 | 0.09880 | 0.36855 | 0.37858 | 1.000 | 0.000 | 1a | 1 |
| 108 C | C108 | 0.11876 | 0.43782 | 0.42590 | 1.000 | 0.000 | 1a | 1 |
| 109 C | C109 | 0.23025 | 0.09880 | 0.37858 | 1.000 | 0.000 | 1a | 1 |
| 110 C | C110 | 0.09569 | 0.24399 | 0.37858 | 1.000 | 0.000 | 1a | 1 |
| 111 C | C111 | 0.11263 | 0.19248 | 0.42590 | 1.000 | 0.000 | 1a | 1 |
| 112 C | C112 | 0.35170 | 0.09569 | 0.37858 | 1.000 | 0.000 | 1a | 1 |
| 113 C | C113 | 0.42015 | 0.11263 | 0.42590 | 1.000 | 0.000 | 1a | 1 |
| 114 C | C114 | 0.18095 | 0.11876 | 0.42590 | 1.000 | 0.000 | 1a | 1 |
| 115 C | C115 | 0.63145 | 0.23025 | 0.37858 | 1.000 | 0.000 | 1a | 1 |
| 116 C | C116 | 0.56218 | 0.18095 | 0.42590 | 1.000 | 0.000 | 1a | 1 |
| 117 C | C117 | 0.90120 | 0.63145 | 0.37858 | 1.000 | 0.000 | 1a | 1 |
| 118 C | C118 | 0.75601 | 0.35170 | 0.37858 | 1.000 | 0.000 | 1a | 1 |
| 119 C | C119 | 0.80752 | 0.42015 | 0.42590 | 1.000 | 0.000 | 1a | 1 |
| 120 C | C120 | 0.88124 | 0.56218 | 0.42590 | 1.000 | 0.000 | 1a | 1 |
| 121 C | C121 | 0.90431 | 0.75601 | 0.47322 | 1.000 | 0.000 | 1a | 1 |
| 122 C | C122 | 0.88737 | 0.80752 | 0.52055 | 1.000 | 0.000 | 1a | 1 |
| 123 C | C123 | 0.76975 | 0.90120 | 0.47322 | 1.000 | 0.000 | 1a | 1 |
| 124 C | C124 | 0.81905 | 0.88124 | 0.52055 | 1.000 | 0.000 | 1a | 1 |
| 125 C | C125 | 0.36855 | 0.76975 | 0.47322 | 1.000 | 0.000 | 1a | 1 |
| 126 C | C126 | 0.64830 | 0.90431 | 0.47322 | 1.000 | 0.000 | 1a | 1 |
| 127 C | C127 | 0.57985 | 0.88737 | 0.52055 | 1.000 | 0.000 | 1a | 1 |
| 128 C | C128 | 0.24399 | 0.64830 | 0.47322 | 1.000 | 0.000 | 1a | 1 |



|       |      |         |         |         |       |       |    |   |
|-------|------|---------|---------|---------|-------|-------|----|---|
| 129 C | C129 | 0.19248 | 0.57985 | 0.52055 | 1.000 | 0.000 | 1a | 1 |
| 130 C | C130 | 0.43782 | 0.81905 | 0.52055 | 1.000 | 0.000 | 1a | 1 |
| 131 C | C131 | 0.09880 | 0.36855 | 0.47322 | 1.000 | 0.000 | 1a | 1 |
| 132 C | C132 | 0.11876 | 0.43782 | 0.52055 | 1.000 | 0.000 | 1a | 1 |
| 133 C | C133 | 0.23025 | 0.09880 | 0.47322 | 1.000 | 0.000 | 1a | 1 |
| 134 C | C134 | 0.09569 | 0.24399 | 0.47322 | 1.000 | 0.000 | 1a | 1 |
| 135 C | C135 | 0.11263 | 0.19248 | 0.52055 | 1.000 | 0.000 | 1a | 1 |
| 136 C | C136 | 0.35170 | 0.09569 | 0.47322 | 1.000 | 0.000 | 1a | 1 |
| 137 C | C137 | 0.42015 | 0.11263 | 0.52055 | 1.000 | 0.000 | 1a | 1 |
| 138 C | C138 | 0.18095 | 0.11876 | 0.52055 | 1.000 | 0.000 | 1a | 1 |
| 139 C | C139 | 0.63145 | 0.23025 | 0.47322 | 1.000 | 0.000 | 1a | 1 |
| 140 C | C140 | 0.56218 | 0.18095 | 0.52055 | 1.000 | 0.000 | 1a | 1 |
| 141 C | C141 | 0.90120 | 0.63145 | 0.47322 | 1.000 | 0.000 | 1a | 1 |
| 142 C | C142 | 0.75601 | 0.35170 | 0.47322 | 1.000 | 0.000 | 1a | 1 |
| 143 C | C143 | 0.80752 | 0.42015 | 0.52055 | 1.000 | 0.000 | 1a | 1 |
| 144 C | C144 | 0.88124 | 0.56218 | 0.52055 | 1.000 | 0.000 | 1a | 1 |
| 145 C | C145 | 0.90431 | 0.75601 | 0.56787 | 1.000 | 0.000 | 1a | 1 |
| 146 C | C146 | 0.88737 | 0.80752 | 0.61519 | 1.000 | 0.000 | 1a | 1 |
| 147 C | C147 | 0.76975 | 0.90120 | 0.56787 | 1.000 | 0.000 | 1a | 1 |
| 148 C | C148 | 0.81905 | 0.88124 | 0.61519 | 1.000 | 0.000 | 1a | 1 |
| 149 C | C149 | 0.36855 | 0.76975 | 0.56787 | 1.000 | 0.000 | 1a | 1 |
| 150 C | C150 | 0.64830 | 0.90431 | 0.56787 | 1.000 | 0.000 | 1a | 1 |
| 151 C | C151 | 0.57985 | 0.88737 | 0.61519 | 1.000 | 0.000 | 1a | 1 |
| 152 C | C152 | 0.24399 | 0.64830 | 0.56787 | 1.000 | 0.000 | 1a | 1 |
| 153 C | C153 | 0.19248 | 0.57985 | 0.61519 | 1.000 | 0.000 | 1a | 1 |
| 154 C | C154 | 0.43782 | 0.81905 | 0.61519 | 1.000 | 0.000 | 1a | 1 |

|        |       |         |         |         |       |       |    |   |
|--------|-------|---------|---------|---------|-------|-------|----|---|
| 155 C  | C155  | 0.09880 | 0.36855 | 0.56787 | 1.000 | 0.000 | 1a | 1 |
| 156 C  | C156  | 0.11876 | 0.43782 | 0.61519 | 1.000 | 0.000 | 1a | 1 |
| 157 C  | C157  | 0.23025 | 0.09880 | 0.56787 | 1.000 | 0.000 | 1a | 1 |
| 158 C  | C158  | 0.09569 | 0.24399 | 0.56787 | 1.000 | 0.000 | 1a | 1 |
| 159 C  | C159  | 0.11263 | 0.19248 | 0.61519 | 1.000 | 0.000 | 1a | 1 |
| 160 C  | C160  | 0.35170 | 0.09569 | 0.56787 | 1.000 | 0.000 | 1a | 1 |
| 161 C  | C161  | 0.42015 | 0.11263 | 0.61519 | 1.000 | 0.000 | 1a | 1 |
| 162 C  | C162  | 0.18095 | 0.11876 | 0.61519 | 1.000 | 0.000 | 1a | 1 |
| 163 C  | C163  | 0.63145 | 0.23025 | 0.56787 | 1.000 | 0.000 | 1a | 1 |
| 164 C  | C164  | 0.56218 | 0.18095 | 0.61519 | 1.000 | 0.000 | 1a | 1 |
| 165 C  | C165  | 0.90120 | 0.63145 | 0.56787 | 1.000 | 0.000 | 1a | 1 |
| 166 C  | C166  | 0.75601 | 0.35170 | 0.56787 | 1.000 | 0.000 | 1a | 1 |
| 167 C  | C167  | 0.80752 | 0.42015 | 0.61519 | 1.000 | 0.000 | 1a | 1 |
| 168 C  | C168  | 0.88124 | 0.56218 | 0.61519 | 1.000 | 0.000 | 1a | 1 |
| 169 Co | Co169 | 0.50882 | 0.49988 | 0.52594 | 1.000 | 0.000 | 1a | 1 |
| 170 Co | Co170 | 0.50882 | 0.65286 | 0.59354 | 1.000 | 0.000 | 1a | 1 |
| 171 Co | Co171 | 0.68547 | 0.58820 | 0.59354 | 1.000 | 0.000 | 1a | 1 |
| 172 Co | Co172 | 0.68547 | 0.74118 | 0.52594 | 1.000 | 0.000 | 1a | 1 |
| 173 Co | Co173 | 0.50882 | 0.34690 | 0.45835 | 1.000 | 0.000 | 1a | 1 |
| 174 Co | Co174 | 0.33218 | 0.41156 | 0.45835 | 1.000 | 0.000 | 1a | 1 |
| 175 Co | Co175 | 0.50882 | 0.65286 | 0.45835 | 1.000 | 0.000 | 1a | 1 |
| 176 Co | Co176 | 0.68547 | 0.58820 | 0.45835 | 1.000 | 0.000 | 1a | 1 |
| 177 Co | Co177 | 0.33218 | 0.25858 | 0.52594 | 1.000 | 0.000 | 1a | 1 |
| 178 Co | Co178 | 0.50882 | 0.34690 | 0.59354 | 1.000 | 0.000 | 1a | 1 |
| 179 Co | Co179 | 0.68547 | 0.43522 | 0.52594 | 1.000 | 0.000 | 1a | 1 |
| 180 Co | Co180 | 0.33218 | 0.41156 | 0.59354 | 1.000 | 0.000 | 1a | 1 |

|        |       |         |         |         |       |       |    |   |
|--------|-------|---------|---------|---------|-------|-------|----|---|
| 181 Co | Co181 | 0.33218 | 0.56454 | 0.52594 | 1.000 | 0.000 | 1a | 1 |
|--------|-------|---------|---------|---------|-------|-------|----|---|

**Atomic coordinates of Co@N-CNT cell models.**

|          | x       | y       | z       | Occ.  | U     | Site | Sym. |
|----------|---------|---------|---------|-------|-------|------|------|
| 1 C C1   | 0.91918 | 0.75309 | 0.00523 | 1.000 | 0.000 | 1a   | 1    |
| 2 C C2   | 0.90002 | 0.81820 | 0.04726 | 1.000 | 0.000 | 1a   | 1    |
| 3 C C3   | 0.77364 | 0.92173 | 0.00596 | 1.000 | 0.000 | 1a   | 1    |
| 4 C C4   | 0.83469 | 0.89520 | 0.04750 | 1.000 | 0.000 | 1a   | 1    |
| 5 C C5   | 0.35423 | 0.77497 | 0.00559 | 1.000 | 0.000 | 1a   | 1    |
| 6 C C6   | 0.67012 | 0.92988 | 0.00626 | 1.000 | 0.000 | 1a   | 1    |
| 7 C C7   | 0.58277 | 0.90365 | 0.04799 | 1.000 | 0.000 | 1a   | 1    |
| 8 C C8   | 0.24418 | 0.66934 | 0.00541 | 1.000 | 0.000 | 1a   | 1    |
| 9 C C9   | 0.18047 | 0.58445 | 0.04738 | 1.000 | 0.000 | 1a   | 1    |
| 10 C C10 | 0.44022 | 0.83498 | 0.04769 | 1.000 | 0.000 | 1a   | 1    |
| 11 C C11 | 0.08443 | 0.35575 | 0.00533 | 1.000 | 0.000 | 1a   | 1    |
| 12 C C12 | 0.10752 | 0.44155 | 0.04722 | 1.000 | 0.000 | 1a   | 1    |
| 13 C C13 | 0.22662 | 0.07805 | 0.00599 | 1.000 | 0.000 | 1a   | 1    |
| 14 C C14 | 0.08068 | 0.24614 | 0.00531 | 1.000 | 0.000 | 1a   | 1    |
| 15 C C15 | 0.10000 | 0.18119 | 0.04733 | 1.000 | 0.000 | 1a   | 1    |
| 16 C C16 | 0.33025 | 0.07008 | 0.00632 | 1.000 | 0.000 | 1a   | 1    |
| 17 C C17 | 0.41777 | 0.09651 | 0.04799 | 1.000 | 0.000 | 1a   | 1    |
| 18 C C18 | 0.16559 | 0.10451 | 0.04755 | 1.000 | 0.000 | 1a   | 1    |
| 19 C C19 | 0.64638 | 0.22480 | 0.00557 | 1.000 | 0.000 | 1a   | 1    |
| 20 C C20 | 0.56033 | 0.16500 | 0.04766 | 1.000 | 0.000 | 1a   | 1    |
| 21 C C21 | 0.91565 | 0.64358 | 0.00532 | 1.000 | 0.000 | 1a   | 1    |
| 22 C C22 | 0.75669 | 0.33017 | 0.00542 | 1.000 | 0.000 | 1a   | 1    |
| 23 C C23 | 0.82028 | 0.41504 | 0.04741 | 1.000 | 0.000 | 1a   | 1    |
| 24 C C24 | 0.89312 | 0.55796 | 0.04723 | 1.000 | 0.000 | 1a   | 1    |

|      |     |         |         |         |       |       |    |   |
|------|-----|---------|---------|---------|-------|-------|----|---|
| 25 C | C25 | 0.91460 | 0.76050 | 0.09470 | 1.000 | 0.000 | 1a | 1 |
| 26 C | C26 | 0.89656 | 0.81251 | 0.14235 | 1.000 | 0.000 | 1a | 1 |
| 27 C | C27 | 0.77820 | 0.91003 | 0.09526 | 1.000 | 0.000 | 1a | 1 |
| 28 C | C28 | 0.82707 | 0.88648 | 0.14259 | 1.000 | 0.000 | 1a | 1 |
| 29 C | C29 | 0.36661 | 0.77896 | 0.09514 | 1.000 | 0.000 | 1a | 1 |
| 30 C | C30 | 0.65359 | 0.91348 | 0.09549 | 1.000 | 0.000 | 1a | 1 |
| 31 C | C31 | 0.58204 | 0.89132 | 0.14292 | 1.000 | 0.000 | 1a | 1 |
| 32 C | C32 | 0.23798 | 0.65557 | 0.09501 | 1.000 | 0.000 | 1a | 1 |
| 33 C | C33 | 0.18931 | 0.58311 | 0.14241 | 1.000 | 0.000 | 1a | 1 |
| 34 C | C34 | 0.43801 | 0.82490 | 0.14277 | 1.000 | 0.000 | 1a | 1 |
| 35 C | C35 | 0.09068 | 0.36801 | 0.09467 | 1.000 | 0.000 | 1a | 1 |
| 36 C | C36 | 0.11565 | 0.43936 | 0.14233 | 1.000 | 0.000 | 1a | 1 |
| 37 C | C37 | 0.22234 | 0.08993 | 0.09529 | 1.000 | 0.000 | 1a | 1 |
| 38 C | C38 | 0.08564 | 0.23909 | 0.09476 | 1.000 | 0.000 | 1a | 1 |
| 39 C | C39 | 0.10398 | 0.18735 | 0.14242 | 1.000 | 0.000 | 1a | 1 |
| 40 C | C40 | 0.34698 | 0.08668 | 0.09550 | 1.000 | 0.000 | 1a | 1 |
| 41 C | C41 | 0.41839 | 0.10831 | 0.14294 | 1.000 | 0.000 | 1a | 1 |
| 42 C | C42 | 0.17352 | 0.11345 | 0.14262 | 1.000 | 0.000 | 1a | 1 |
| 43 C | C43 | 0.63387 | 0.22079 | 0.09515 | 1.000 | 0.000 | 1a | 1 |
| 44 C | C44 | 0.56240 | 0.17463 | 0.14277 | 1.000 | 0.000 | 1a | 1 |
| 45 C | C45 | 0.90968 | 0.63157 | 0.09464 | 1.000 | 0.000 | 1a | 1 |
| 46 C | C46 | 0.76255 | 0.34399 | 0.09502 | 1.000 | 0.000 | 1a | 1 |
| 47 C | C47 | 0.81094 | 0.41644 | 0.14245 | 1.000 | 0.000 | 1a | 1 |
| 48 C | C48 | 0.88448 | 0.56027 | 0.14233 | 1.000 | 0.000 | 1a | 1 |
| 49 C | C49 | 0.91366 | 0.76029 | 0.18956 | 1.000 | 0.000 | 1a | 1 |
| 50 C | C50 | 0.89420 | 0.81080 | 0.23691 | 1.000 | 0.000 | 1a | 1 |

|      |     |         |         |         |       |       |    |   |
|------|-----|---------|---------|---------|-------|-------|----|---|
| 51 C | C51 | 0.77481 | 0.90425 | 0.18978 | 1.000 | 0.000 | 1a | 1 |
| 52 C | C52 | 0.82417 | 0.88378 | 0.23699 | 1.000 | 0.000 | 1a | 1 |
| 53 C | C53 | 0.36655 | 0.77446 | 0.18977 | 1.000 | 0.000 | 1a | 1 |
| 54 C | C54 | 0.65147 | 0.90679 | 0.18989 | 1.000 | 0.000 | 1a | 1 |
| 55 C | C55 | 0.58100 | 0.88816 | 0.23687 | 1.000 | 0.000 | 1a | 1 |
| 56 C | C56 | 0.24045 | 0.65243 | 0.18968 | 1.000 | 0.000 | 1a | 1 |
| 57 C | C57 | 0.19038 | 0.58165 | 0.23684 | 1.000 | 0.000 | 1a | 1 |
| 58 C | C58 | 0.43738 | 0.82142 | 0.23693 | 1.000 | 0.000 | 1a | 1 |
| 59 C | C59 | 0.09353 | 0.36791 | 0.18947 | 1.000 | 0.000 | 1a | 1 |
| 60 C | C60 | 0.11633 | 0.43835 | 0.23676 | 1.000 | 0.000 | 1a | 1 |
| 61 C | C61 | 0.22581 | 0.09576 | 0.18979 | 1.000 | 0.000 | 1a | 1 |
| 62 C | C62 | 0.08695 | 0.23974 | 0.18957 | 1.000 | 0.000 | 1a | 1 |
| 63 C | C63 | 0.10617 | 0.18912 | 0.23693 | 1.000 | 0.000 | 1a | 1 |
| 64 C | C64 | 0.34896 | 0.09299 | 0.18991 | 1.000 | 0.000 | 1a | 1 |
| 65 C | C65 | 0.41934 | 0.11119 | 0.23691 | 1.000 | 0.000 | 1a | 1 |
| 66 C | C66 | 0.17629 | 0.11630 | 0.23698 | 1.000 | 0.000 | 1a | 1 |
| 67 C | C67 | 0.63385 | 0.22457 | 0.18981 | 1.000 | 0.000 | 1a | 1 |
| 68 C | C68 | 0.56301 | 0.17733 | 0.23698 | 1.000 | 0.000 | 1a | 1 |
| 69 C | C69 | 0.90665 | 0.63184 | 0.18949 | 1.000 | 0.000 | 1a | 1 |
| 70 C | C70 | 0.75977 | 0.34708 | 0.18971 | 1.000 | 0.000 | 1a | 1 |
| 71 C | C71 | 0.80954 | 0.41811 | 0.23687 | 1.000 | 0.000 | 1a | 1 |
| 72 C | C72 | 0.88366 | 0.56146 | 0.23677 | 1.000 | 0.000 | 1a | 1 |
| 73 C | C73 | 0.90953 | 0.75838 | 0.28433 | 1.000 | 0.000 | 1a | 1 |
| 74 C | C74 | 0.88737 | 0.80752 | 0.33126 | 1.000 | 0.000 | 1a | 1 |
| 75 C | C75 | 0.77315 | 0.90439 | 0.28412 | 1.000 | 0.000 | 1a | 1 |
| 76 C | C76 | 0.81905 | 0.88124 | 0.33126 | 1.000 | 0.000 | 1a | 1 |

|       |      |         |         |         |       |       |    |   |
|-------|------|---------|---------|---------|-------|-------|----|---|
| 77 C  | C77  | 0.36717 | 0.77262 | 0.28427 | 1.000 | 0.000 | 1a | 1 |
| 78 C  | C78  | 0.65004 | 0.90694 | 0.28418 | 1.000 | 0.000 | 1a | 1 |
| 79 C  | C79  | 0.57985 | 0.88737 | 0.33126 | 1.000 | 0.000 | 1a | 1 |
| 80 C  | C80  | 0.24123 | 0.65058 | 0.28428 | 1.000 | 0.000 | 1a | 1 |
| 81 C  | C81  | 0.19248 | 0.57985 | 0.33126 | 1.000 | 0.000 | 1a | 1 |
| 82 C  | C82  | 0.43782 | 0.81905 | 0.33126 | 1.000 | 0.000 | 1a | 1 |
| 83 C  | C83  | 0.09488 | 0.36803 | 0.28415 | 1.000 | 0.000 | 1a | 1 |
| 84 C  | C84  | 0.11876 | 0.43782 | 0.33126 | 1.000 | 0.000 | 1a | 1 |
| 85 C  | C85  | 0.22693 | 0.09554 | 0.28409 | 1.000 | 0.000 | 1a | 1 |
| 86 C  | C86  | 0.09055 | 0.24144 | 0.28433 | 1.000 | 0.000 | 1a | 1 |
| 87 C  | C87  | 0.11263 | 0.19248 | 0.33126 | 1.000 | 0.000 | 1a | 1 |
| 88 C  | C88  | 0.35008 | 0.09292 | 0.28416 | 1.000 | 0.000 | 1a | 1 |
| 89 C  | C89  | 0.42015 | 0.11263 | 0.33126 | 1.000 | 0.000 | 1a | 1 |
| 90 C  | C90  | 0.18095 | 0.11876 | 0.33126 | 1.000 | 0.000 | 1a | 1 |
| 91 C  | C91  | 0.63307 | 0.22674 | 0.28429 | 1.000 | 0.000 | 1a | 1 |
| 92 C  | C92  | 0.56218 | 0.18095 | 0.33126 | 1.000 | 0.000 | 1a | 1 |
| 93 C  | C93  | 0.90522 | 0.63195 | 0.28415 | 1.000 | 0.000 | 1a | 1 |
| 94 C  | C94  | 0.75873 | 0.34926 | 0.28432 | 1.000 | 0.000 | 1a | 1 |
| 95 C  | C95  | 0.80752 | 0.42015 | 0.33126 | 1.000 | 0.000 | 1a | 1 |
| 96 C  | C96  | 0.88124 | 0.56218 | 0.33126 | 1.000 | 0.000 | 1a | 1 |
| 97 C  | C97  | 0.90431 | 0.75601 | 0.37858 | 1.000 | 0.000 | 1a | 1 |
| 98 C  | C98  | 0.88737 | 0.80752 | 0.42590 | 1.000 | 0.000 | 1a | 1 |
| 99 C  | C99  | 0.76975 | 0.90120 | 0.37858 | 1.000 | 0.000 | 1a | 1 |
| 100 C | C100 | 0.81905 | 0.88124 | 0.42590 | 1.000 | 0.000 | 1a | 1 |
| 101 C | C101 | 0.36855 | 0.76975 | 0.37858 | 1.000 | 0.000 | 1a | 1 |
| 102 C | C102 | 0.64830 | 0.90431 | 0.37858 | 1.000 | 0.000 | 1a | 1 |

|       |      |         |         |         |       |       |    |   |
|-------|------|---------|---------|---------|-------|-------|----|---|
| 103 C | C103 | 0.57985 | 0.88737 | 0.42590 | 1.000 | 0.000 | 1a | 1 |
| 104 C | C104 | 0.24399 | 0.64830 | 0.37858 | 1.000 | 0.000 | 1a | 1 |
| 105 C | C105 | 0.19248 | 0.57985 | 0.42590 | 1.000 | 0.000 | 1a | 1 |
| 106 C | C106 | 0.43782 | 0.81905 | 0.42590 | 1.000 | 0.000 | 1a | 1 |
| 107 C | C107 | 0.09880 | 0.36855 | 0.37858 | 1.000 | 0.000 | 1a | 1 |
| 108 C | C108 | 0.11876 | 0.43782 | 0.42590 | 1.000 | 0.000 | 1a | 1 |
| 109 C | C109 | 0.23025 | 0.09880 | 0.37858 | 1.000 | 0.000 | 1a | 1 |
| 110 C | C110 | 0.09569 | 0.24399 | 0.37858 | 1.000 | 0.000 | 1a | 1 |
| 111 C | C111 | 0.11263 | 0.19248 | 0.42590 | 1.000 | 0.000 | 1a | 1 |
| 112 C | C112 | 0.35170 | 0.09569 | 0.37858 | 1.000 | 0.000 | 1a | 1 |
| 113 C | C113 | 0.42015 | 0.11263 | 0.42590 | 1.000 | 0.000 | 1a | 1 |
| 114 C | C114 | 0.18095 | 0.11876 | 0.42590 | 1.000 | 0.000 | 1a | 1 |
| 115 C | C115 | 0.63145 | 0.23025 | 0.37858 | 1.000 | 0.000 | 1a | 1 |
| 116 C | C116 | 0.56218 | 0.18095 | 0.42590 | 1.000 | 0.000 | 1a | 1 |
| 117 C | C117 | 0.90120 | 0.63145 | 0.37858 | 1.000 | 0.000 | 1a | 1 |
| 118 C | C118 | 0.75601 | 0.35170 | 0.37858 | 1.000 | 0.000 | 1a | 1 |
| 119 C | C119 | 0.80752 | 0.42015 | 0.42590 | 1.000 | 0.000 | 1a | 1 |
| 120 C | C120 | 0.88124 | 0.56218 | 0.42590 | 1.000 | 0.000 | 1a | 1 |
| 121 C | C121 | 0.90431 | 0.75601 | 0.47322 | 1.000 | 0.000 | 1a | 1 |
| 122 C | C122 | 0.88737 | 0.80752 | 0.52055 | 1.000 | 0.000 | 1a | 1 |
| 123 N | N123 | 0.76975 | 0.90120 | 0.47322 | 1.000 | 0.000 | 1a | 1 |
| 124 C | C124 | 0.81905 | 0.88124 | 0.52055 | 1.000 | 0.000 | 1a | 1 |
| 125 C | C125 | 0.36855 | 0.76975 | 0.47322 | 1.000 | 0.000 | 1a | 1 |
| 126 C | C126 | 0.64830 | 0.90431 | 0.47322 | 1.000 | 0.000 | 1a | 1 |
| 127 C | C127 | 0.57985 | 0.88737 | 0.52055 | 1.000 | 0.000 | 1a | 1 |
| 128 C | C128 | 0.24399 | 0.64830 | 0.47322 | 1.000 | 0.000 | 1a | 1 |



|     |   |      |         |         |         |       |       |    |   |
|-----|---|------|---------|---------|---------|-------|-------|----|---|
| 129 | C | C129 | 0.19248 | 0.57985 | 0.52055 | 1.000 | 0.000 | 1a | 1 |
| 130 | N | N130 | 0.43782 | 0.81905 | 0.52055 | 1.000 | 0.000 | 1a | 1 |
| 131 | C | C131 | 0.09880 | 0.36855 | 0.47322 | 1.000 | 0.000 | 1a | 1 |
| 132 | C | C132 | 0.11876 | 0.43782 | 0.52055 | 1.000 | 0.000 | 1a | 1 |
| 133 | C | C133 | 0.23025 | 0.09880 | 0.47322 | 1.000 | 0.000 | 1a | 1 |
| 134 | C | C134 | 0.09569 | 0.24399 | 0.47322 | 1.000 | 0.000 | 1a | 1 |
| 135 | N | N135 | 0.11263 | 0.19248 | 0.52055 | 1.000 | 0.000 | 1a | 1 |
| 136 | C | C136 | 0.35170 | 0.09569 | 0.47322 | 1.000 | 0.000 | 1a | 1 |
| 137 | C | C137 | 0.42015 | 0.11263 | 0.52055 | 1.000 | 0.000 | 1a | 1 |
| 138 | C | C138 | 0.18095 | 0.11876 | 0.52055 | 1.000 | 0.000 | 1a | 1 |
| 139 | C | C139 | 0.63145 | 0.23025 | 0.47322 | 1.000 | 0.000 | 1a | 1 |
| 140 | N | N140 | 0.56218 | 0.18095 | 0.52055 | 1.000 | 0.000 | 1a | 1 |
| 141 | C | C141 | 0.90120 | 0.63145 | 0.47322 | 1.000 | 0.000 | 1a | 1 |
| 142 | C | C142 | 0.75601 | 0.35170 | 0.47322 | 1.000 | 0.000 | 1a | 1 |
| 143 | C | C143 | 0.80752 | 0.42015 | 0.52055 | 1.000 | 0.000 | 1a | 1 |
| 144 | C | C144 | 0.88124 | 0.56218 | 0.52055 | 1.000 | 0.000 | 1a | 1 |
| 145 | C | C145 | 0.90431 | 0.75601 | 0.56787 | 1.000 | 0.000 | 1a | 1 |
| 146 | C | C146 | 0.88737 | 0.80752 | 0.61519 | 1.000 | 0.000 | 1a | 1 |
| 147 | C | C147 | 0.76975 | 0.90120 | 0.56787 | 1.000 | 0.000 | 1a | 1 |
| 148 | C | C148 | 0.81905 | 0.88124 | 0.61519 | 1.000 | 0.000 | 1a | 1 |
| 149 | C | C149 | 0.36855 | 0.76975 | 0.56787 | 1.000 | 0.000 | 1a | 1 |
| 150 | C | C150 | 0.64830 | 0.90431 | 0.56787 | 1.000 | 0.000 | 1a | 1 |
| 151 | C | C151 | 0.57985 | 0.88737 | 0.61519 | 1.000 | 0.000 | 1a | 1 |
| 152 | C | C152 | 0.24399 | 0.64830 | 0.56787 | 1.000 | 0.000 | 1a | 1 |
| 153 | C | C153 | 0.19248 | 0.57985 | 0.61519 | 1.000 | 0.000 | 1a | 1 |
| 154 | C | C154 | 0.43782 | 0.81905 | 0.61519 | 1.000 | 0.000 | 1a | 1 |

|     |    |       |         |         |         |       |       |    |   |
|-----|----|-------|---------|---------|---------|-------|-------|----|---|
| 155 | C  | C155  | 0.09880 | 0.36855 | 0.56787 | 1.000 | 0.000 | 1a | 1 |
| 156 | N  | N156  | 0.11876 | 0.43782 | 0.61519 | 1.000 | 0.000 | 1a | 1 |
| 157 | C  | C157  | 0.23025 | 0.09880 | 0.56787 | 1.000 | 0.000 | 1a | 1 |
| 158 | C  | C158  | 0.09569 | 0.24399 | 0.56787 | 1.000 | 0.000 | 1a | 1 |
| 159 | C  | C159  | 0.11263 | 0.19248 | 0.61519 | 1.000 | 0.000 | 1a | 1 |
| 160 | N  | N160  | 0.35170 | 0.09569 | 0.56787 | 1.000 | 0.000 | 1a | 1 |
| 161 | C  | C161  | 0.42015 | 0.11263 | 0.61519 | 1.000 | 0.000 | 1a | 1 |
| 162 | C  | C162  | 0.18095 | 0.11876 | 0.61519 | 1.000 | 0.000 | 1a | 1 |
| 163 | C  | C163  | 0.63145 | 0.23025 | 0.56787 | 1.000 | 0.000 | 1a | 1 |
| 164 | C  | C164  | 0.56218 | 0.18095 | 0.61519 | 1.000 | 0.000 | 1a | 1 |
| 165 | N  | N165  | 0.90120 | 0.63145 | 0.56787 | 1.000 | 0.000 | 1a | 1 |
| 166 | C  | C166  | 0.75601 | 0.35170 | 0.56787 | 1.000 | 0.000 | 1a | 1 |
| 167 | C  | C167  | 0.80752 | 0.42015 | 0.61519 | 1.000 | 0.000 | 1a | 1 |
| 168 | C  | C168  | 0.88124 | 0.56218 | 0.61519 | 1.000 | 0.000 | 1a | 1 |
| 169 | Co | Co169 | 0.51837 | 0.49721 | 0.52594 | 1.000 | 0.000 | 1a | 1 |
| 170 | Co | Co170 | 0.51837 | 0.65019 | 0.59354 | 1.000 | 0.000 | 1a | 1 |
| 171 | Co | Co171 | 0.69501 | 0.58554 | 0.59354 | 1.000 | 0.000 | 1a | 1 |
| 172 | Co | Co172 | 0.69501 | 0.73852 | 0.52594 | 1.000 | 0.000 | 1a | 1 |
| 173 | Co | Co173 | 0.51837 | 0.34424 | 0.45835 | 1.000 | 0.000 | 1a | 1 |
| 174 | Co | Co174 | 0.34172 | 0.40889 | 0.45835 | 1.000 | 0.000 | 1a | 1 |
| 175 | Co | Co175 | 0.51837 | 0.65019 | 0.45835 | 1.000 | 0.000 | 1a | 1 |
| 176 | Co | Co176 | 0.69501 | 0.58554 | 0.45835 | 1.000 | 0.000 | 1a | 1 |
| 177 | Co | Co177 | 0.34172 | 0.25591 | 0.52594 | 1.000 | 0.000 | 1a | 1 |
| 178 | Co | Co178 | 0.51837 | 0.34424 | 0.59354 | 1.000 | 0.000 | 1a | 1 |
| 179 | Co | Co179 | 0.69501 | 0.43256 | 0.52594 | 1.000 | 0.000 | 1a | 1 |
| 180 | Co | Co180 | 0.34172 | 0.40889 | 0.59354 | 1.000 | 0.000 | 1a | 1 |

|        |       |         |         |         |       |       |    |   |
|--------|-------|---------|---------|---------|-------|-------|----|---|
| 181 Co | Co181 | 0.34172 | 0.56187 | 0.52594 | 1.000 | 0.000 | 1a | 1 |
|--------|-------|---------|---------|---------|-------|-------|----|---|

## References

1. Z. Liang, G. Zhou, H. Tan, Y. Mou, J. Zhang, H. Guo, S. Yang, H. Lei, H. Zheng, W. Zhang, H. Lin and R. Cao, *Adv. Mater.*, 2024, **36**, 2408094.
2. T. Liu, S. Zhao, Y. Wang, J. Yu, Y. Dai, J. Wang, X. Sun, K. Liu and M. Ni, *Small*, 2022, **18**, 2105887.
3. Z. Liang, N. Kong, C. Yang, W. Zhang, H. Zheng, H. Lin and R. Cao, *Angew. Chem. Int. Ed.*, 2021, **60**, 12759-12764.
4. Y. Liu, L. Zhou, S. Liu, S. Li, J. Zhou, X. Li, X. Chen, K. Sun, B. Li, J. Jiang and H. Pang, *Angew. Chem. Int. Ed.*, 2024, **63**, e202319983.
5. Y. Xu, X. Jin, J. Zhang, H. Qin, B. Mei, T. Liu, S. Lei, S. Li, Y. Bo, X. Li and R. Cao, *ACS Catal.*, 2024, **14**, 14350-14355.
6. J. Qin, Z. Liu, D. Wu and J. Yang, *Appl. Catal., B*, 2020, **278**, 119300.
7. G. Guan, Y. Liu, F. Li, X. Shi, L. Liu, T. Wang, X. Xu, M. Zhao, J. Ding and H. B. Yang, *Adv. Funct. Mater.*, 2024, **2408111**.
8. Z. Liang, C. Zhang, H. Yuan, W. Zhang, H. Zheng and R. Cao, *Chem. Commun.*, 2018, **54**, 7519-7522.
9. Y. Son, K. Min, S. Cheong, B. Lee, S. E. Shim and S.-H. Baeck, *Adv. Sci.*, 2024, 2407915.
10. X. Ma, Z. Xu, M. Liu, P. Qiao, Q. Li, R. Wang and B. Jiang, *J. Energy Chem.*, 2025, **101**, 99-109.
11. J. Zhang, Y. Mou, W. Suo, S. Yang, J. Shen, H. Xu, Z. Zeng, R. Zhang, Z. Liang, Y. Wang, H. Zheng, J. Cao and R. Cao, *Adv. Funct. Mater.*, 2024, 2417621.
12. J. Zhong, Z. Zhu, Q. Xu, L. Peng, K. Luo and D. Yuan, *Energy Fuels*, 2023, **37**, 13489-13497.
13. W. Xu, R. Zeng, M. Rebarchik, A. Posada-Borbón, H. Li, C. J. Pollock, M. Mavrikakis and H. D. Abruña, *J. Am. Chem. Soc.*, 2024, **146**, 2593-2603.

14. K. Serbara Bejigo, K. Bhunia, J. Kim, C. Lee, S. Back and S.-J. Kim, *J. Energy Chem.*, 2023, **82**, 148-157.
15. L. Lin, H. Sun, X. Yuan, Y. Gu, Q. Mu, P. Qi, T. Yan, L. Zhang, Y. Peng and Z. Deng, *Chem. Eng. J.*, 2022, **428**, 131225.
16. J. Liu, Y. Guo, X.-Z. Fu, J.-L. Luo and C. Zhi, *Green Energy Environ.*, 2023, **8**, 459-469.
17. Z. Liang, J. Zhang, H. Zheng and R. Cao, *Chem. Commun.*, 2024, **60**, 2216-2219.
18. Y. Ruan, H. Xu, H. Lei, W. Xue, T. Wang, S. Song, Y. Yu, G.-R. Zhang and D. Mei, *Inorg. Chem. Front.*, 2023, **10**, 2370-2379.
19. W. Chen, X. Zhu, W. Wei, H. Chen, T. Dong, R. Wang, M. Liu, K. Ostrikov, P. Peng and S.-Q. Zang, *Small*, 2023, **19**, 2304294.
20. L. Li, N. Li, J. Xia, S. Zhou, X. Qian, F. Yin, G. He and H. Chen, *J. Mater. Chem. A*, 2023, **11**, 2291-2301.
21. X. Li, X. Lv, P. Sun and X. Sun, *ACS Appl. Mater. Interfaces*, 2024, **16**, 29979-29990.
22. H. Lei, Q. Zhang, Z. Liang, H. Guo, Y. Wang, H. Lv, X. Li, W. Zhang, U.-P. Apfel and R. Cao, *Angew. Chem. Int. Ed.*, 2022, **61**, e202201104.
23. C. Lv, B. Li, Y. Ren, G. Zhang, Z. Lu, L. Li, X. Zhang, X. Yang and X. Yu, *Chem. Eng. J.*, 2024, **495**, 153670.
24. L. Zou, C.-C. Hou, Z. Liu, H. Pang and Q. Xu, *J. Am. Chem. Soc.*, 2018, **140**, 15393-15401.
25. Q. Yang, Y. Jia, F. Wei, L. Zhuang, D. Yang, J. Liu, X. Wang, S. Lin, P. Yuan and X. Yao, *Angew. Chem. Int. Ed.*, 2020, **59**, 6122-6127.
26. Y.-P. Deng, Y. Jiang, R. Liang, S.-J. Zhang, D. Luo, Y. Hu, X. Wang, J.-T. Li, A. Yu and Z. Chen, *Nat. Commun.*, 2020, **11**, 1952.
27. H. Zhang, H.-C. Chen, S. Feizpoor, L. Li, X. Zhang, X. Xu, Z. Zhuang, Z. Li, W. Hu, R. Snyders, D. Wang and C. Wang, *Adv. Mater.*, 2024, **36**, 2400523.

28. D. Cao, Y. Mu, L. Liu, Z. Mou, S. Chen, W. Yan, H. Zhou, T.-S. Chan, L.-Y. Chang, L. Song, H.-J. Zhai and X. Fan, *ACS Nano*, 2024, **18**, 11474-11486.
29. D. Duan, J. Huo, J. Chen, B. Chi, Z. Chen, S. Sun, Y. Zhao, H. Zhao, Z. Cui and S. Liao, *Small*, 2024, **20**, 2310491.
30. Z. Zhang, X. Zhao, S. Xi, L. Zhang, Z. Chen, Z. Zeng, M. Huang, H. Yang, B. Liu, S. J. Pennycook and P. Chen, *Adv. Energy Mater.*, 2020, **10**, 2002896.
31. M. Liu, J. Zhang, H. Su, Y. Jiang, W. Zhou, C. Yang, S. Bo, J. Pan and Q. Liu, *Nat. Commun.*, 2024, **15**, 1675.
